1 **Synergy between Wsp1 and Dip1 may initiate assembly of endocytic actin networks**

2 Connor J. Balzer<sup>1</sup>, Michael L. James<sup>2</sup>, Luke A. Helgeson<sup>3</sup>, Vladimir Sirotkin<sup>2</sup>, and Brad J. Nolen<sup>1,4</sup>

3

4 <sup>1</sup>Department of Chemistry and Biochemistry, Institute of Molecular Biology, University of Oregon,  
5 Eugene, OR 97403, USA

6 <sup>2</sup>Department of Cell and Developmental Biology, SUNY Upstate Medical University, Syracuse, NY 13210,  
7 USA.

8 <sup>3</sup>Current address: Department of Biochemistry, University of Washington, Seattle, WA 98195, USA

9 <sup>4</sup>Correspondence: [bnolen@uoregon.edu](mailto:bnolen@uoregon.edu)

10

11

12

13 **Abstract**

14 The actin filament nucleator Arp2/3 complex is activated at cortical sites in *S. pombe* to assemble  
15 branched actin networks that drive endocytosis. Arp2/3 complex activators Wsp1 and Dip1 are required  
16 for proper actin assembly at endocytic sites, but how they coordinately control Arp2/3-mediated actin  
17 assembly is unknown. Alone, Dip1 activates Arp2/3 complex without preexisting actin filaments to  
18 nucleate “seed” filaments that activate Wsp1-bound Arp2/3 complex, thereby initiating branched actin  
19 network assembly. In contrast, because Wsp1 requires pre-existing filaments to activate, it has been  
20 assumed to function exclusively in propagating actin networks by stimulating branching from pre-  
21 existing filaments. Here we show that Wsp1 is important not only for propagation, but also for initiation  
22 of endocytic actin networks. Using single molecule TIRF microscopy we show that Wsp1 synergizes with  
23 Dip1 to co-activate Arp2/3 complex. Synergistic coactivation does not require pre-existing actin  
24 filaments, explaining how Wsp1 contributes to actin network initiation in cells.

25

26 **Introduction**

27 Arp2/3 complex is an important cytoskeletal regulator that nucleates actin filament networks important  
28 in a broad range of cellular processes, including cell motility, differentiation, endocytosis, meiotic  
29 spindle positioning, and DNA repair (Goley and Welch, 2006; Hurst et al., 2019; Rotty et al., 2013; Yi et  
30 al., 2011). Multiple classes of nucleation promoting factors (NPFs), including WASP family proteins (Type

31 I NPFs), cortactin and related proteins (Type II NPFs) and WISH/DIP/SPIN90 (WDS) family proteins,  
32 activate the nucleation activity of Arp2/3 complex in response to cellular signals (Goley and Welch 2006;  
33 Wagner et al. 2013). *In vitro*, activated NPFs can function independently to efficiently stimulate actin  
34 filament nucleation by Arp2/3 complex, but in cells, actin networks assembled by Arp2/3 complex  
35 frequently contain multiple classes of NPFs with non-redundant roles in actin assembly (Galletta et al.,  
36 2008; Murphy and Courtneidge, 2011; Sirotkin et al., 2005). Understanding how distinct NPFs  
37 coordinately control Arp2/3 complex to assemble cellular actin networks is critical to understanding  
38 actin regulation.

39 At sites of endocytosis in *S. pombe*, Arp2/3 complex nucleates the assembly of branched actin  
40 networks that drive invagination of the plasma membrane (Sun et al., 2019). The activity of Arp2/3  
41 complex at endocytic sites can be controlled by at least three distinct NPFs: Wsp1, Dip1, and Myo1  
42 (Sirotkin et al., 2005; Wagner et al., 2013). Each of these NPFs is relatively potent in activating Arp2/3  
43 complex *in vitro*, and analysis of *wsp1* mutant or *dip1* knockout strains suggests that activation of Arp2/3  
44 complex by both NPFs is required for normal endocytic actin assembly (Basu and Chang, 2011; Sirotkin  
45 et al., 2005; Wagner et al., 2013). On the other hand, while multiple experiments suggest the motor  
46 activity of Myo1 is important for normal actin dynamics, mutations in the Myo1 Arp2/3-activating  
47 segment do not influence endocytic internalization or coat protein dynamics, indicating the NPF activity  
48 of Myo1 may not be important for actin assembly in *S. pombe* (MacQuarrie et al., 2019; Sun et al., 2019).

49 It is currently unknown how Wsp1 and Dip1 cooperate to assemble functional endocytic actin  
50 networks in *S. pombe*, but key biochemical differences between these NPFs have led to a model for their  
51 coordinate activity. Wsp1, the *S. pombe* member of the WASP family NPFs, has a characteristic VCA  
52 motif at its C-terminus that is sufficient for activation of Arp2/3 complex (Higgs and Pollard, 2001;  
53 Sirotkin et al., 2005). The CA segment within this motif binds Arp2/3 complex at two sites (Boczkowska  
54 et al., 2014; Luan et al., 2018b; Padrick et al., 2011; Ti et al., 2011), while the V segment binds actin

55 monomers, which Wsp1 must recruit to the complex to trigger nucleation (Marchand et al., 2001;  
56 Rohatgi et al., 1999). Importantly, the Wsp1-bound Arp2/3 complex must also bind to a pre-existing  
57 actin filament to stimulate nucleation (Achard et al., 2010; Machesky et al., 1999; Smith et al., 2013a;  
58 Wagner et al., 2013). This requirement ensures that Wsp1 creates branched actin filaments when it  
59 activates the complex, but also means a preformed filament must be provided to seed assembly of the  
60 network. Dip1, like the other members of the WISH/DIP/SPIN90 (WDS) family proteins, uses an  
61 armadillo repeat domain to bind and activate Arp2/3 complex (Luan et al., 2018a). Unlike Wsp1, Dip1  
62 does not require a pre-existing actin filament to trigger nucleation (Wagner et al., 2013). Therefore,  
63 Dip1-mediated activation of Arp2/3 complex creates linear filaments instead of branches (Wagner et al.,  
64 2013). Importantly, the linear filaments nucleated by Dip1-activated Arp2/3 complex can activate Wsp1-  
65 bound Arp2/3 complex, which creates new branched actin filaments that activate subsequent rounds of  
66 Wsp1-Arp2/3-mediated branching nucleation (Balzer et al., 2018). Therefore, by activating Arp2/3  
67 complex without a preformed actin filament, Dip1 kickstarts the assembly of branched actin networks.  
68 These biochemical observations have led to a model of how Dip1 and Wsp1 coordinate actin assembly  
69 at endocytic sites in yeast. In this model, the role of Dip1 as an NPF is solely to generate seed filaments  
70 that initiate the assembly of the endocytic actin network, whereas Wsp1 exclusively functions as a  
71 propagator of branched networks once they have been initiated.

72         Recent live cell imaging data support distinct seeding and propagating roles for Dip1 and Wsp1,  
73 respectively. For instance, in *dip1Δ* strains, the rate of initiation of new patches is markedly decreased,  
74 but once an endocytic actin network is initiated, it assembles rapidly, suggesting Dip1 is important for  
75 seeding but not propagation of the network (Basu and Chang, 2011). Further, deletion of the Wsp1 CA  
76 segment motif causes failure of endocytic actin patches to internalize, a process thought to be  
77 dependent on the propagation of branches (Sun et al., 2019). However, some data suggests that the  
78 seeding and propagating roles of Wsp1 and Dip1 might not be distinct. Specifically, biochemical and

79 structural data suggested that the two NPFs might simultaneously bind Arp2/3 complex, so they may  
80 potentially synergize to activate nucleation (Luan et al., 2018a, 2018b; Wagner et al., 2013).

81 Here we show that contrary to the previous model, Wsp1 cooperates with Dip1 to generate  
82 seed filaments. We provide evidence that this cooperation is important for initiation of endocytic actin  
83 networks in cells. By imaging endocytic actin patch dynamics in *S. pombe*, we find that despite the fact  
84 that Wsp1 is a key biochemical propagator of branched actin networks, it also has a significant influence  
85 on the rate at which new endocytic actin patches are created in *S. pombe*, indicating it plays a role in  
86 initiation. Through single molecule TIRF microscopy along with kinetic assays and modelling, we find that  
87 the role of Wsp1 in initiation is likely due to its ability to synergize with Dip1 to activate Arp2/3 complex.  
88 Specifically, we show that Dip1 and Wsp1 coactivate actin filament nucleation by Arp2/3 complex *in*  
89 *vitro*. Unexpectedly, in coactivating the complex with Wsp1, Dip1 converts Wsp1 from a branched to  
90 linear filament generating NPF. Coactivation by Wsp1 and Dip1 requires actin monomer recruitment by  
91 Wsp1 but does not require a preformed actin filament. As a result, the two NPFs together can more  
92 potently create seed filaments for branched network initiation than Dip1 alone. This explains the  
93 decreased rate of patch initiation resulting from Wsp1 mutations that block its activation of Arp2/3  
94 complex in cells.

95

## 96 **Results**

### 97 **Deletion of the WASP CA segment causes a decrease in the patch initiation rate**

98 To test their relative importance in the initiation versus propagation of endocytic actin  
99 networks, we measured the influence of Dip1 and Wsp1 mutations on actin dynamics in fission yeast  
100 using the endocytic actin patch marker Fim1 labeled with GFP (Berro and Pollard, 2014a). In wild type  
101 cells, Fim1-marked actin patches accumulate in cortical puncta over ~5 sec before moving inward and  
102 simultaneously disassembling (Fig. 1A-C, Video S1), (Berro and Pollard, 2014b; Sirotkin et al., 2010)). To

103 quantify actin patch initiation defects, we measured the rate at which new Fim1-marked puncta  
104 appeared in the cell (Fig. 1D). As expected based on previous results, the Dip1 deletion strain showed a  
105 significant reduction in the patch initiation rate compared to the wild type strain (0.030 versus 0.0076  
106 patches/sec/ $\mu\text{M}^2$ ) and a corresponding decrease in the number of actin patches in the cell (Fig. 1D,E,  
107 Video S2) (Basu and Chang, 2011). However, once actin assembly was initiated, Fim1-GFP accumulated  
108 at the same rate or more rapidly than in the wild type strain (Fig. 1B,C). These observations are  
109 consistent with previously reported measurements (Basu and Chang, 2011), and suggest that Dip1  
110 contributes to the initiation but not the propagation of branched endocytic actin networks.

111 To investigate the contribution of Wsp1 toward initiation and propagation of the actin networks,  
112 we deleted the sequence encoding the CA segment of Wsp1 in the endogenous *wsp1* locus and  
113 measured the influence of this mutation on actin dynamics. Deletion of the CA segment prevents Wsp1  
114 from binding or activating Arp2/3 complex (Marchand et al., 2001), but leaves intact its WASP-homology  
115 1 domain, proline-rich segment, and actin binding Verprolin-homology motif (V). In the *wsp1 $\Delta$ CA* mutant  
116 the average time between the first appearance of Fim1-GFP and when it reaches peak concentration,  
117 which we refer to here as the Fim1 assembly time, increased from 5.1 to 6.7 seconds, consistent with  
118 another recent study (Fig. 1B,C) (Sun et al., 2019). In addition, the *wsp1 $\Delta$ CA* mutation decreased the  
119 percentage of actin patches that internalized (Fig 1F, VideoS3). These observations are consistent with a  
120 role for Wsp1 in the propagation of branched actin during endocytosis. However, to our surprise, we  
121 also found that *wsp1 $\Delta$ CA* cells also showed a 40 percent decrease in the rate of initiation of new actin  
122 patches compared to wild type cells (Fig. 1D). While this defect is less than observed in *dip1 $\Delta$*  cells, it  
123 suggests – contrary to our initial prediction – that Wsp1 may play a role in initiating new endocytic actin  
124 patches. Deletion of both the CA segment of *wsp1* and the entire coding region of *dip1* (*dip1 $\Delta$* ,  
125 *wsp1 $\Delta$ CA*) did not decrease the actin patch initiation rate more than deletion of Dip1 alone (Fig. 1D,

126 Video S4). This suggests that Wsp1 may contribute to the Dip1-mediated actin patch initiation pathway  
127 rather than acting in a separate parallel pathway for initiation of actin assembly.

128

### 129 **Dip1 and Wsp1 synergize during Arp2/3-mediated actin filament assembly**

130 Previous biochemical and structural data suggested that Dip1 and Wsp1 might simultaneously  
131 bind Arp2/3 complex, so they could potentially cooperate to activate nucleation (Luan et al., 2018a,  
132 2018b; Wagner et al., 2013). We reasoned that by directly synergizing with Dip1 to activate Arp2/3  
133 complex, Wsp1 could contribute to actin network initiation. However, how the two NPFs together  
134 influence the activity of Arp2/3 complex is uncertain. Previous data showed Dip1 is a more potent  
135 activator of Arp2/3 complex than Wsp1, and that mixing both Wsp1 and Dip1 in a bulk actin  
136 polymerization assay increased the actin polymerization rate, but the reason for the increase was  
137 unknown (Wagner et al., 2013). Specifically, because those experiments were carried out at sub-  
138 saturating conditions, it was unclear whether Wsp1 and Dip1 activate in independent but additive  
139 pathways or alternatively, if the two NPFs synergize in activation of Arp2/3 complex. To test this, we  
140 titrated Dip1 into actin polymerization reactions containing Arp2/3 complex and the minimal Arp2/3-  
141 activating region of Wsp1, Wsp1-VCA. Dip1 was saturating at ~40  $\mu$ M, and at this concentration the  
142 addition of Wsp1-VCA increased the maximum polymerization rate in the pyrene actin assembly assays  
143 ~1.6 fold over reactions with Dip1 alone (Fig 2A,B, Supplementary Table 1). These results suggest that  
144 the increased actin polymerization rates in the presence of both NPFs cannot be explained by an  
145 additive effect in activating Arp2/3 complex, but instead the NPFs are synergistic.

146

### 147 **Wsp1 synergizes with Dip1 and Arp2/3 complex to produce linear actin filaments.**

148 Our bulk actin polymerization assays demonstrate that Wsp1 and Dip1 synergize to activate  
149 Arp2/3 complex, but it is unclear whether synergetic activation requires that the complex bind a

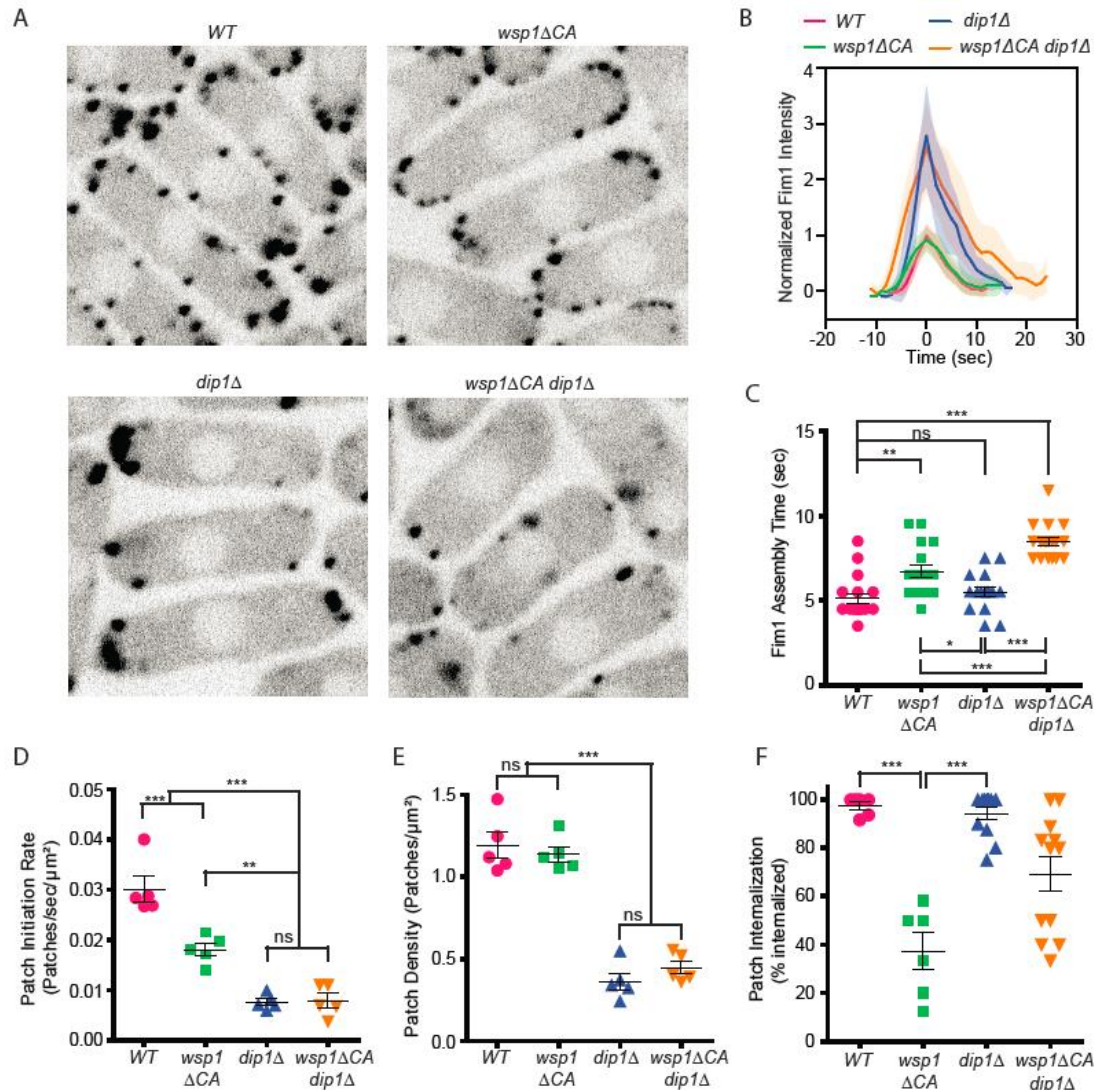

150  
151 **Figure 1: Wsp1 plays a role in the initiation of endocytic actin patches.** **A.** Equatorial plane images of Fim1-GFP in *S. pombe*  
152 cells taken using spinning disk confocal microscopy. Scale Bar: 5  $\mu\text{m}$ . **B.** Plot showing the relative Fim1-GFP intensity in *S. pombe*  
153 mutant endocytic patches over their lifetimes. Traces represent the average of 16-18 endocytic patches. Standard deviation is  
154 shown as shaded region around each trace. **C.** Plot comparing the assembly time of Fim1-GFP in endocytic patches in wildtype  
155 cells to *wsp1ΔCA*, *dip1Δ*, and *wsp1ΔCA dip1Δ* mutants. Error bars: standard error from 16-18 patches. **D.** Plot comparing the  
156 endocytic patch initiation rate in wildtype cells to *wsp1ΔCA*, *dip1Δ*, and *wsp1ΔCA dip1Δ* mutants. Error bars: standard error  
157 from 5 cells. **E.** Plot comparing the endocytic actin patch density in wildtype cells to *wsp1ΔCA*, *dip1Δ*, and *wsp1ΔCA dip1Δ*  
158 mutants as determined based on the number of Fim1-GFP-marked cortical puncta. Error bars: standard error from 5 cells. **F.**  
159 Plot showing the percentage of endocytic patches internalized in wild type and mutant *S. pombe* cells. Error bars: standard  
160 error from 6 to 12 cells. P-values: \* < 0.05, \*\* < 0.01, \*\*\* < 0.001.

161

162 preformed actin filament, as occurs when Wsp1 activates Arp2/3 complex on its own. Therefore, it is

163 unclear whether the synergistic activation mechanism could explain how Wsp1 contributes to initiation

164 of new endocytic actin patches. To better understand how the two NPFs synergize, we used single

165 molecule TIRF microscopy to monitor the assembly of Oregon Green 488-labeled actin in the presence  
166 of Arp2/3 complex and Wsp1, Dip1, or both NPFs. We labeled Dip1 with Alexa Fluor 568 (568-Dip1) to  
167 mark actin filaments nucleated by Arp2/3 complex and Dip1. In the presence of Arp2/3 complex and  
168 568-Dip1, we observed assembly of linear filaments, a subset of which had Dip1 bound at one end (Fig.  
169 2C). These filaments, which largely represent Dip1-Arp2/3 nucleated filaments (Balzer et al., 2018),  
170 account for 3.4% of the total number for filament pointed ends present in the reaction after two and a  
171 half minutes (Fig. 2C,D). Adding Wsp1-VCA to the reaction significantly increased the number of linear  
172 actin filaments with bound Dip1. At 1  $\mu$ M Wsp1-VCA, the number of Dip1-bound filaments increased 12-  
173 fold over reactions without Wsp1 (Fig. 2C,D). These data demonstrate that synergistic activation of  
174 Arp2/3 complex by the two NPFs results in the nucleation of linear rather than branched actin filaments.  
175 Therefore, we conclude that like Dip1-mediated activation (Wagner et al., 2013), synergistic co-  
176 activation by both NPFs does not require a pre-existing actin filament.

177         Because Wsp1 may function as an oligomer when clustered at endocytic sites (Padrick et al.,  
178 2008), we also tested if Wsp1-VCA dimerized with GST synergizes with Dip1 to activate Arp2/3 complex.  
179 Under our initial reaction conditions (100 nM Arp2/3 complex and 1  $\mu$ M GST-VCA), we did not detect  
180 synergistic coactivation of the complex by Dip1 and GST-VCA (Fig. 2D). However, in reactions in which  
181 the concentration of Arp2/3 complex was increased 2.5-fold, the number of pointed ends with bound  
182 Dip1 increased significantly in the presence of GST-VCA, indicating dimeric (GST) Wsp1-VCA synergizes  
183 with Dip1 (Fig. 2E,F). To further investigate the influence of Wsp1 dimerization on synergy, we  
184 compared the influence of monomeric and dimeric Wsp1-VCAs on the maximum polymerization rate in  
185 bulk pyrene actin polymerization assays containing Arp2/3 complex and a range of Dip1 concentrations  
186 (Fig. 2G). These data showed both dimeric and monomeric Wsp1-VCA significantly decrease the  
187 concentration of Dip1 required to saturate the reaction (Fig. 2H). However, unlike monomeric Wsp1-  
188 VCA, dimeric Wsp1-VCA did not increase the maximum polymerization rate at saturating Dip1. These



189 data demonstrate that monomeric Wsp1 is more potent in its synergy with Dip1 than dimeric Wsp1, and  
190 point to differences in the mechanism of synergistic activation between monomeric and dimeric Wsp1-  
191 VCA (see Discussion).

192

### 193 **Actin monomers stimulate activation of Arp2/3 complex by Dip1**

194 To determine the mechanism of co-activation by Dip1 and Wsp1, we first examined the kinetics  
195 of activation by Dip1 alone to identify steps in the activation pathway that might be accelerated by  
196 Wsp1. We measured time courses of actin polymerization in reactions containing actin, *S. pombe* Arp2/3  
197 complex and a range of concentrations of Dip1 (0-15  $\mu$ M) and asked whether various kinetic models  
198 were consistent with the polymerization time courses (Fig. 3A). In the simplest model we considered  
199 (Fig. 3B (model i)), Dip1 binds to Arp2/3 complex and initiates an irreversible activation step to create a  
200 filament barbed end. This step could represent an activating conformational change, such as movement  
201 of Arp2 and Arp3 into the short pitch helical arrangement or subunit flattening of Arp3 (Fig. 3B)  
202 (Rodnick-Smith et al., 2016; Rouiller et al., 2008; Wagner et al., 2013). The value of the irreversible  
203 activation step was floated in the simulations, and the other rate constants were fixed or restrained as  
204 described in the supplementary materials. The simple model produced simulated time polymerization  
205 courses that fit the data poorly compared to the measured time courses (Fig. 3A, Supplementary Fig. 1).  
206 Specifically, the simulations predicted faster polymerization than observed at time points near steady  
207 state when the concentration of free actin monomers is low. Therefore, we wondered whether collision  
208 with and binding of one or more actin monomers to the Dip1-Arp2/3 assembly might be required to  
209 complete the activation process and create a nucleus. To test this, we altered the kinetic model to  
210 include one or more actin monomer binding steps before creation of the nucleus (Fig. 3B, (models ii-iii),  
211 Supplementary Fig. 2). These models produced simulated polymerization time courses that fit the data  
212 significantly better than the reaction pathway without actin monomer collisions (Fig. 3C,D). The pathway

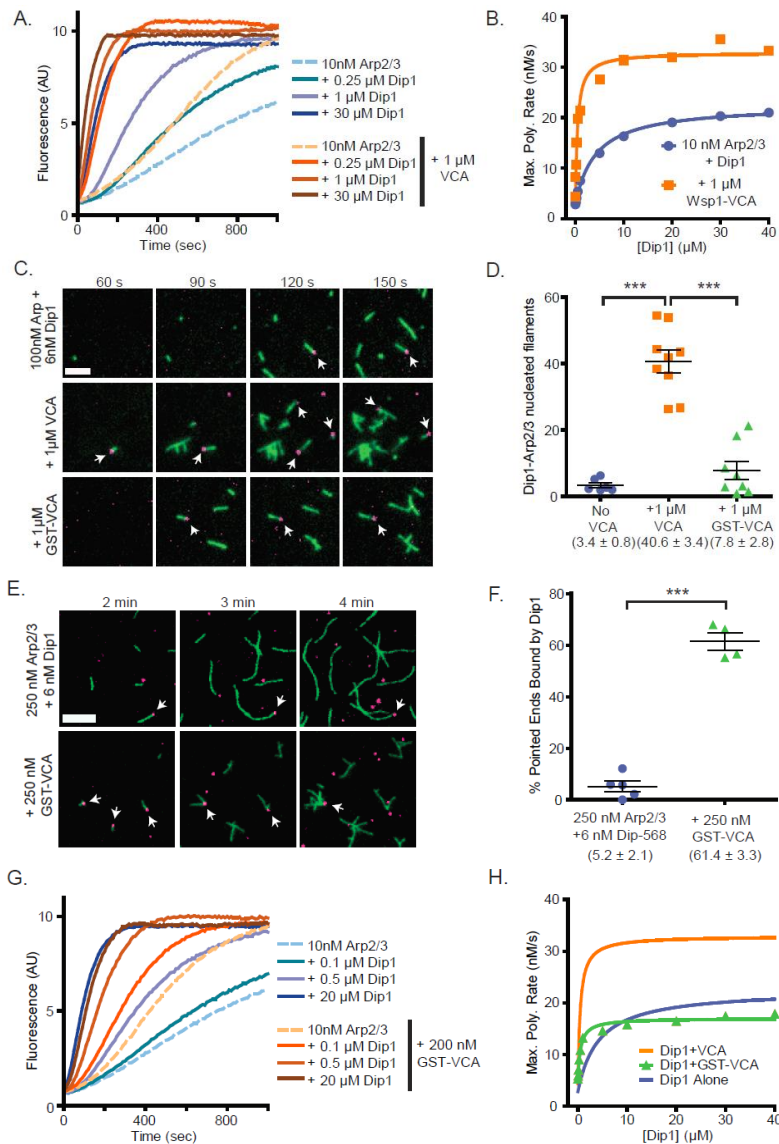

213

214

215

216 **Figure 2: Wsp1-VCA increases the number of linear filaments nucleated by Dip1-bound Arp2/3 complex.** A. Time courses of

217 polymerization of 3  $\mu\text{M}$  15% pyrene-labeled actin in the presence of 10 nM *S. pombe* Arp2/3 complex (SpArp2/3 complex) and 0

218 to 30  $\mu\text{M}$  *S. pombe* Dip1 (Dip1) with or without 1  $\mu\text{M}$  *S. pombe* Wsp1-VCA (Wsp1-VCA). B. Plot of the maximum polymerization

219 rates in pyrene-labeled actin polymerization assays as described in A. Data were fit to a hyperbolic equation as described in the

220 methods and in Supplementary Table 1. C. TIRF microscopy images of actin polymerization assays containing 100 nM SpArp2/3,

221 6 nM Alexa Fluor 568-labeled SpDip1 (568-Dip1)(magenta) and 1.5  $\mu\text{M}$  33% Oregon Green labeled actin (green) with or without

222 1  $\mu\text{M}$  SpWsp1-VCA or 1  $\mu\text{M}$  GST-SpWsp1-VCA. The panels are aligned by the reaction times noted above each column. White

223 arrows indicate actin filament pointed ends bound by 568-Dip1. Scale bar: 2  $\mu\text{m}$ . D. Quantification of the percentage of pointed

224 ends bound by 568-Dip1 two minutes and thirty seconds into actin polymerization assays in C. Error bars represent the mean

225 with standard error. P-values \*\*\* = < 0.0001. E. TIRF microscopy images of actin polymerization assays containing 250 nM

226 SpArp2/3, 6 nM 568-Dip1 (magenta) and 1.5  $\mu\text{M}$  33% Oregon Green labeled actin (green) in the presence or absence of 250 nM

227 GST-SpWsp1-VCA. The panels are aligned by the reaction times noted above each column. White arrows indicate actin filament

228 pointed ends bound by 568-Dip1. Scale bar: 3  $\mu\text{m}$ . F. Quantification of the percentage of pointed ends bound by 568-Dip1 two

229 minutes and thirty seconds into actin polymerization assays in E. Error bars represent the mean with standard error. P-values

230 \*\*\* = < 0.0001. G. Time courses of polymerization of 3  $\mu\text{M}$  15% pyrene-labeled actin in the presence of 10 nM SpArp2/3

231 complex and 0 to 20  $\mu\text{M}$  Dip1 with or without 200 nM GST-SpWsp1-VCA. H. Plot of the maximum polymerization rate in pyrene-

232 labeled actin polymerization assays containing GST-Wsp1-VCA and Dip1 as described in G. The fits for reactions without Wsp1

or with Wsp1-VCA (panel B) are shown for comparison. See Supplementary Table 1 for details on parameters of fits.

233 with one actin monomer binding step fit the data most closely, but the fits with two or three monomer  
 234 binding steps also improved the fit over the reaction pathway without actin monomer binding (Fig. 3D).  
 235 These data suggest that actin monomer binding to the Dip1-bound Arp2/3 complex stimulates  
 236 activation.  
 237

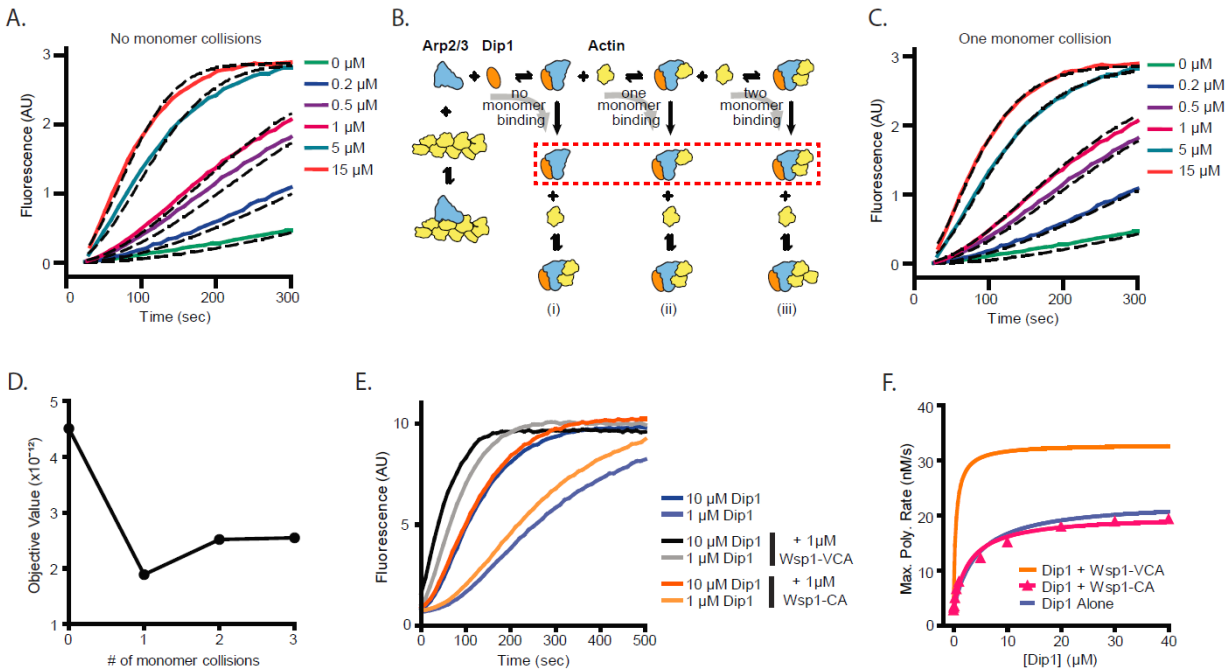

238 **Figure 3: Monomer recruitment by Wsp1-VCA is required for maximal coactivation of Arp2/3 complex with Dip1.** **A.** Plot of  
 239 time courses of polymerization of 3  $\mu\text{M}$  15% pyrene-labeled actin in the presence of 50 nM SpArp2/3 complex and 0 to 15  $\mu\text{M}$   
 240 Dip1 (solid colored lines). Dashed lines over each trace show the best fits from the no monomer collision model in B. Only a  
 241 subset of the reactions and fits used in the simulation are shown. For the complete data set see Supplementary Figure 1. **B.**  
 242 Cartoon diagram showing kinetic pathways used to fit the experimental polymerization time courses. Dashed red lines indicate  
 243 the nucleus in each of the three pathways tested. For additional details see Supplementary Figure 2 and Supplementary Table  
 244 2. **C.** Plot of time courses of pyrene actin polymerization (solid lines) as in A, with dashed lines over each trace indicating the  
 245 best fits from the one monomer collision model in B. **D.** Plot of the objective value obtained from the fits of the pyrene-labeled  
 246 actin polymerization data in A and C with models containing 0 to 3 monomer collisions. The objective value represents the  
 247 normalized mean square weighted sum of squares (see methods). **E.** Time courses of polymerization of 3  $\mu\text{M}$  15% pyrene-  
 248 labeled actin containing 10 nM SpArp2/3 complex and 1  $\mu\text{M}$  or 10  $\mu\text{M}$  Dip1 with or without 1  $\mu\text{M}$  SpWsp1-CA or 1  $\mu\text{M}$  SpWsp1-  
 249 VCA. **F.** Plot of the maximum polymerization rates of the pyrene-labeled actin polymerization assays as in E. The fits for  
 250 reactions without Wsp1 or with Wsp1-VCA (Figure 2B) are shown for comparison. Data points were fit as described in the  
 251 methods. See Supplementary Table 1 for details on parameters of fits.  
 252

253

254

255 **Actin monomer recruitment by Wsp1 is required for co-activation of Arp2/3 complex by Wsp1 and**  
256 **Dip1**

257 Our data suggest that slow binding of actin monomers to Dip1-bound Arp2/3 complex limits the  
258 nucleation rate. Importantly, unlike Dip1, Wsp1 binds both Arp2/3 complex and actin monomers, so it  
259 can directly recruit actin monomers to nascent nucleation sites (Beltzner and Pollard, 2008; Marchand et  
260 al., 2001). Therefore, we wondered if Wsp1 synergizes with Dip1 by recruiting actin monomers to the  
261 Dip1-Arp2/3 complex assembly. To test this, we asked whether the actin monomer-recruiting V region  
262 of Wsp1 is required for synergistic coactivation of Arp2/3 complex by Dip1 and Wsp1. We found that  
263 while adding Wsp1-VCA to actin polymerization reactions containing saturating Dip1 increased the  
264 maximal polymerization rate ~1.6-fold compared to reactions without Wsp1, addition of Wsp1-CA had  
265 little or no effect on the maximum polymerization rate (Fig. 3E,F). Therefore, we conclude that actin  
266 monomer recruitment by Wsp1 is required for potent synergy with Dip1. Wsp1-CA decreased slightly  
267 the concentration of Dip1 required for half maximal saturation ( $K_{1/2}$ ), suggesting it influences one or  
268 more of the activation steps (Supplementary Table 1). However, this influence was small compared to  
269 the reduction in the  $K_{1/2}$  of Dip1 caused by Wsp1 with a V region (Supplementary Table 1).

270

271 **Increased monomer affinity for the nascent nucleus cannot explain synergy on its own**

272 Our data show that Wsp1 must recruit actin monomers to Arp2/3 complex to potently synergize  
273 with Dip1 in activation. To better understand how actin monomer recruitment contributes to synergy  
274 we sought to kinetically model synergistic activation of the complex by the two NPFs. To decrease the  
275 number of unknown rate constants inherent in an explicit model of all the reactions in a mixture  
276 containing Dip1, Wsp1 and Arp2/3 complex, we used a simplified model based on the activation by Dip1  
277 alone (Fig. 4A,B). We asked if this simplified model could fit time courses of actin polymerization for  
278 reactions containing both Dip1 and Wsp1 if the rate constants of key steps were increased. We limited

279 the fitting to reactions with Dip1 concentrations greater than 0.5  $\mu$ M, as higher concentrations of Dip1  
280 limit the contribution of branching nucleation to actin assembly (Balzer et al., 2019). This allowed us to  
281 ignore the action of Wsp1 alone on Arp2/3 complex in the simulated reactions. Given that Wsp1 directly  
282 tethers actin monomers to the complex, we first asked whether increasing the monomer affinity for the  
283 Dip1-Arp2/3 assembly could explain the increased rate of filament nucleation. To test this, we simulated  
284 polymerization using the Dip1 alone activation model and allowed the off rate ( $k_{-10}$ ) for the actin  
285 monomer bound to the Dip1-Arp2/3 assembly to float. All other rate constants were fixed at the values  
286 determined for reactions without Wsp1. These simulations fit the data poorly, indicating the synergy  
287 between Wsp1 and Dip1 cannot be explained by increased affinity of actin monomers for the Dip1-  
288 Arp2/3 assembly alone (Fig. 4C,D). However, when we floated the dissociation constant for actin  
289 monomers ( $k_{-10}$ ) and either the  $k_{\text{off}}$  of Dip1 for Arp2/3 complex ( $k_{-9}$ ) or the rate constant for the  
290 activation step ( $k_{11}$ ) (or all three), the simulations closely matched the measured polymerization time  
291 courses (Fig. 4D,E, Supplementary Table 3). These observations suggest that multiple steps in the Dip1-  
292 mediated activation pathway are accelerated when Wsp1-bound actin monomers are recruited to the  
293 complex.

294

## 295 **DISCUSSION**

296 Here we propose a model in which Wsp1 synergizes with Dip1 to activate Arp2/3 complex and  
297 initiate the assembly of endocytic actin networks. Previous measurements of the dynamics of  
298 fluorescently labeled NPFs support this model, because they show that the two NPFs colocalize at  
299 endocytic sites and arrive with nearly identical timing,  $\sim$ 2 seconds before actin filaments begin to  
300 polymerize (Basu and Chang, 2011; Sirotkin et al., 2010). Given that Dip1 is biochemically specialized to  
301 initiate branched actin network assembly, it might be expected to peak in concentration before actin  
302 begins to polymerize. However, the accumulation kinetics of Dip1 are nearly identical to Wsp1; both

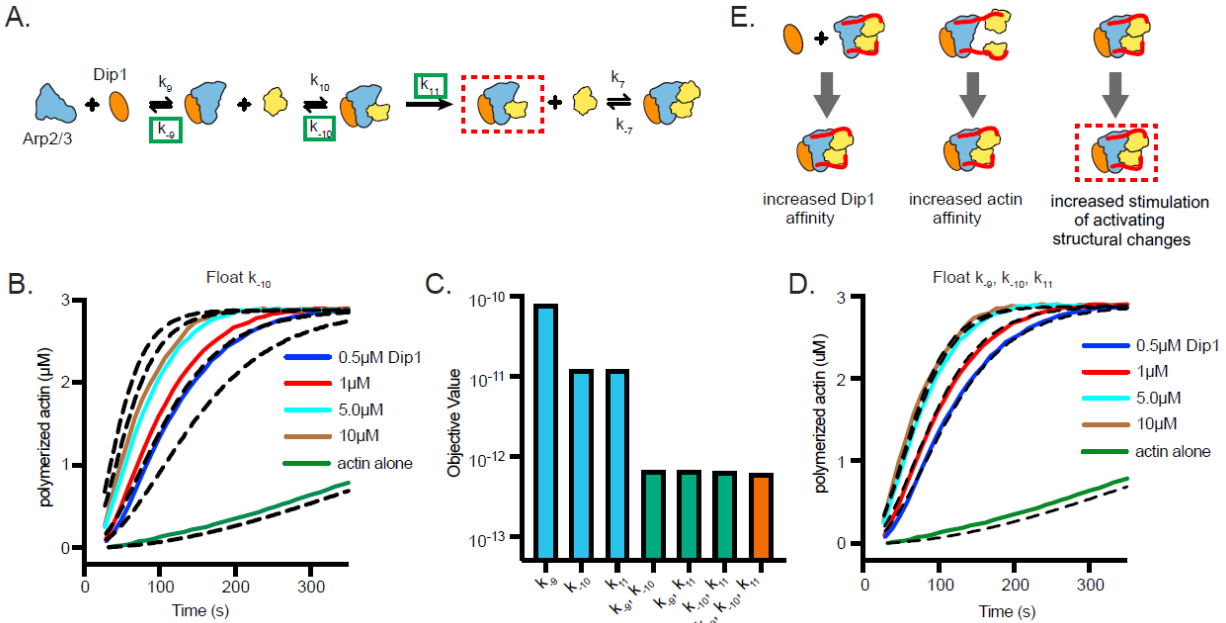

303  
 304 **Figure 4. Wsp1-bound monomer recruitment accelerates multiple steps of the Dip1-mediated activation pathway. A.**  
 305 Simplified kinetic model of synergistic activation of Arp2/3 complex by Dip1 and Wsp1 based on the Dip1 alone “one monomer  
 306 binding” activation pathway from Fig. 3B. Note that Wsp1-VCA is not explicitly included in the model. Rate constants boxed in  
 307 green were floated to fit time courses of reactions that contained both Dip1 and monomeric Wsp1-VCA. The purpose of this  
 308 simplified model is to test the potential influence of Wsp1-mediated actin monomer recruitment on the steps of Dip1-mediated  
 309 activation of Arp2/3 complex highlighted in E. **B.** Plot of time courses of polymerization of 3 µM 15% pyrene-labeled actin in the  
 310 presence of 50 nM SpArp2/3 complex, 1 µM Wsp1-VCA and a range of Dip1 from 0 to 15 µM (solid colored lines). Dashed lines  
 311 over each trace indicate the best fits from the model where only the off rate of the actin monomer bound to Dip1-Arp2/3  
 312 complex ( $k_{-10}$ ) was floated. Only a subset of the time courses used for the simulation are shown. **C.** Objective values obtained  
 313 from models floating the noted parameters. The objective value represents the normalized mean square weighted sum of  
 314 squares (see methods). **D.** Plot of time courses of shown in B. Dashed lines over each trace indicate the best fits from the model  
 315 where  $k_{-9}$ ,  $k_{-10}$  and  $k_{11}$  were floated. Only a subset of the traces fit by the model are shown. **E.** Depiction of the steps in Dip1-  
 316 mediated activation of Arp2/3 complex that may be influenced by monomer recruitment. Dashed red lines in A and E indicate  
 317 the nucleation competent state.

318  
 319 accumulate over ~6 sec as actin assembles, reach a peak concentration just before (~2s) the actin  
 320 filament concentration peaks, and then dissociate as the patch begins to internalize and actin  
 321 disassembles (Basu and Chang, 2011). The gradual accumulation of Dip1 suggests that it might  
 322 coactivate Arp2/3 complex with Wsp1 well after actin polymerization has been initiated and throughout  
 323 the assembly/propagation of the actin patch. This activity would have implications for determining the  
 324 architecture of actin filament networks at the endocytic sites (see below).

325 Relatively little is known about how the NPFs that control actin assembly at endocytic sites are  
 326 regulated, despite their importance in driving endocytosis. In *S. cerevisiae*, both inhibitors and activators

327 of the WASP family protein Las17 have been identified (Goode et al., 2015), and recent experiments  
328 suggest that clustering Las17 at high concentrations at endocytic sites might trigger its activity (Sun et  
329 al., 2017). Building evidence suggests homologues of the proteins that regulate Las17 in *S. cerevisiae*  
330 may control Wsp1 activity in *S. pombe* (Arasada and Pollard, 2011; MacQuarrie et al., 2019), perhaps at  
331 least partially by clustering it at endocytic sites. Almost nothing is known about the regulation of Dip1,  
332 but we show here that Wsp1 synergizes with Dip1, so activators that turn on Wsp1 could also indirectly  
333 stimulate Dip1 (Fig. 5). Therefore, an attractive hypothesis is that the activation pathway for Wsp1  
334 stimulates both Wsp1 and Dip1, thereby coordinating the initiation and propagation phases of endocytic  
335 actin assembly (Fig. 5). However, some evidence supports the existence of a distinct activation pathway  
336 for Dip1. For instance, the N-terminal ~160 amino acids of Dip1 is not required for activity (Wagner et  
337 al., 2013), but this segment is relatively well conserved among yeast, so may play a role in localizing or  
338 regulating Dip1 independent of Wsp1. Given that initiation is a key step in regulating the assembly of  
339 branched actin networks, elucidating how cells control the activity of Dip1 will be an important future  
340 goal.

341

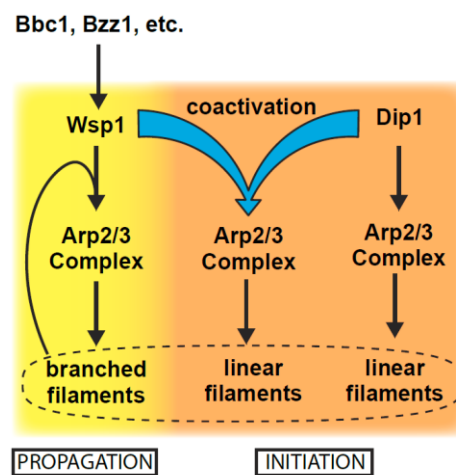

342

343 **Figure 5. Dip1 and Wsp1 regulation may be coordinated through coactivation of Arp2/3 complex.** Schematic of the activation  
344 pathways of Arp2/3 complex by Dip1 and Wsp1. Nucleation of linear actin filaments by Arp2/3 complex is critical for initiation  
345 of actin networks, while branching nucleation promotes propagation of actin networks. Regulatory factors required for Wsp1  
346 activation can indirectly trigger Dip1 activity by coactivating it with Arp2/3 complex.

347

348            Electron microscopy studies indicate that endocytic actin networks are branched (Young et al.,  
349    2004), and the highly dendritic nature of these filamentous networks is thought to allow them to drive  
350    invagination of the plasma membrane (Lacy et al., 2018). Wsp1 creates a branched actin filament when  
351    it activates Arp2/3 complex on its own, but we show here that when Wsp1 activates the complex with  
352    Dip1 it creates a linear actin filament. This observation suggests that cells may need to limit synergistic  
353    activation of Arp2/3 complex by Dip1 and Wsp1 to preserve the dendritic nature of endocytic actin  
354    networks. We anticipate that synergistic activation by Wsp1 and Dip1 is limited by the same  
355    mechanisms that prevent Dip1 alone from activating too many Arp2/3 complexes at endocytic sites. For  
356    instance, we showed previously that when Dip1 activates on its own, it remains bound to Arp2/3  
357    complex long after nucleation, unlike Wsp1, so each Dip1 molecule likely only activates one Arp2/3  
358    complex (Balzer et al., 2019). We found here that even when it activates with Wsp1, Dip1 stays bound to  
359    Arp2/3 complex on the ends of filaments long after nucleation, so Dip1 likely functions as a single  
360    turnover NPF in the context of synergistic activation (Fig. 2). Combined with the low concentration of  
361    Dip1 at endocytic actin patches, this single turnover mechanism may help limit the number of linear  
362    filaments created at endocytic sites (Balzer et al., 2019; Basu and Chang, 2011). Competition with actin  
363    filaments may provide a second mechanism for limiting linear filaments generated through synergy  
364    between Wsp1 and Dip1. We showed previously that actin filaments compete with WDS proteins for  
365    binding to Arp2/3 complex (Luan et al., 2018a). Therefore, even if both NPFs are present, activation by  
366    Wsp1 alone may dominate once actin filaments begin to accumulate at endocytic sites.

367            Our simulations of actin polymerization kinetics indicate that when Dip1 activates Arp2/3  
368    complex on its own, actin monomers collide with and bind to the Dip1-Arp2/3 complex assembly to help  
369    create the nucleation-competent state. While the function of bound actin monomers is uncertain,  
370    multiple lines of evidence suggest that actin monomer binding may stimulate activating conformational  
371    changes in the Dip1-Arp2/3 complex assembly. For instance, both Dip1 alone and actin monomers



372 recruited by WASP proteins stimulate movement of Arp2 and Arp3, the two actin-related proteins in the  
373 complex, into a filament-like arrangement called the short pitch conformation (Hetrick et al., 2013;  
374 Rodnick-Smith et al., 2016; Wagner et al., 2013; Zimmet et al., 2020). Therefore, one possibility is that  
375 actin monomers stimulate Dip1-mediated activation by helping the Dip1-bound complex adopt the  
376 short pitch conformation. Furthermore, a low resolution EM structure of a branch junction suggests  
377 Arp3 undergoes an intra-subunit conformational change called flattening upon activation (Rouiller et al.,  
378 2008). This structural change, which brings Arp2 and Arp3 closer to the conformation that actin subunits  
379 adopt in filaments, may also be stimulated by binding of actin monomers to the Dip1-Arp2/3 complex  
380 assembly.

381           We show here that direct tethering of actin monomers by monomeric Wsp1 potently  
382 accelerates activation of Arp2/3 complex by Dip1, allowing the two NPFs to synergize. Direct tethering  
383 of actin monomers to the Dip1-Arp2/3 complex assembly increases their effective concentration, which  
384 could potentially explain synergy between Dip1 and Wsp1. However, a kinetic model that accounted for  
385 the increased effective concentration (by decreasing the off rate of actin monomers for the Dip1-Arp2/3  
386 assembly) could not fully explain the acceleration of actin polymerization in reactions containing both  
387 NPFs (Fig. 4). To accurately simulate synergistic activation, our models also had to allow Wsp1-recruited  
388 actin to either increase the affinity of Dip1 for Arp2/3 complex or to accelerate the final activation step  
389 (Fig. 4). While it is unclear whether one or both of these additional steps are influenced during  
390 synergistic activation, we previously showed that Dip1 does not influence the binding affinity of  
391 monomeric Wsp1 in a fluorescence anisotropy binding assay (Wagner et al., 2013), arguing against  
392 cooperative binding to Arp2/3 complex by the two NPFs. Therefore, we speculate that Wsp1-recruited  
393 actin monomers may stimulate the activating step (modeled as  $k_{11}$  in our simulations) more rapidly than  
394 randomly colliding and binding actin monomers. Understanding the molecular basis for the acceleration

395 of this step will be important for understanding how Dip1 and Wsp1 activate Arp2/3 complex  
396 synergistically and on their own.

397         A surprising result of this work is that Wsp1 dimerized by GST showed significantly less synergy  
398 with Dip1 than monomeric Wsp1. While dimerized Wsp1 moderately decreased the amount of Dip1  
399 required to reach half maximal saturation ( $K_{1/2}$ , see Supplementary Table 1), at saturating Dip1, the  
400 maximum polymerization rate was less with GST-Wsp1 than without it. Given that dimeric WASP  
401 proteins can recruit two actin monomers and typically bind ~100-150 fold more tightly to the complex  
402 than monomeric WASP proteins (Padrick et al., 2011, 2008), we initially expected that dimeric Wsp1  
403 would have greater synergy with Dip1 than Wsp1 monomers. However, previous biochemical and  
404 structural data indicate that WASP proteins - when activating on their own - must be released from  
405 nascent branch junctions before nucleation (Helgeson and Nolen, 2013; Smith et al., 2013b). Because  
406 they likely bind the branch junction more tightly (Helgeson and Nolen, 2013), dimeric WASP proteins are  
407 thought to release more slowly, thereby decreasing how fast nucleation occurs once WASP is bound  
408 compared to monomeric WASP constructs. Therefore, tight binding by dimeric Wsp1 to the nascent  
409 linear filament nucleus could slow its release, thereby decreasing the nucleation rate and diminishing  
410 synergy between Dip1 and Wsp1. The significant differences we observed between dimeric and  
411 monomeric Wsp1 in synergizing with Dip1 highlight the need to better understand how Wsp1 activates  
412 Arp2/3 complex in cells. Recent experiments in budding yeast showed that Las17 is recruited to  
413 endocytic sites through a set of multivalent interactions similar to the types of interactions that  
414 incorporate WASP proteins into phase separated droplets *in vitro* (Banjade and Rosen, 2014; Li et al.,  
415 2012; Sun et al., 2017). Whether or not Wsp1 accumulates in similar phase separated droplets, it will be  
416 important to understand if Wsp1 engages Arp2/3 complex as a monomer or oligomer, as this will  
417 significantly influence the kinetics of its activation of the complex alone or with Dip1.

418

419 **Supplementary Tables and Figures**

|                                 | Dip1 Alone     | Dip1 + Wsp1-VCA  | Dip1 + GST-VCA   | Dip1 + Wsp1-CA |
|---------------------------------|----------------|------------------|------------------|----------------|
| <b>Best-fit values</b>          |                |                  |                  |                |
| Max. Poly. Rate <sub>max</sub>  | 19.77          | 28.61            | 11.75            | 17.12          |
| K <sub>1/2</sub>                | 4.222          | 0.4718           | 0.5706           | 2.894          |
| <b>Std. Error</b>               |                |                  |                  |                |
| Max. Poly. Rate <sub>max</sub>  | 0.4248         | 0.8862           | 0.3265           | 0.6942         |
| K <sub>1/2</sub>                | 0.3755         | 0.07717          | 0.08303          | 0.5443         |
| <b>95% Confidence Intervals</b> |                |                  |                  |                |
| Max. Poly. Rate <sub>max</sub>  | 18.81 to 20.73 | 26.61 to 30.62   | 11.01 to 12.49   | 15.55 to 18.69 |
| K <sub>1/2</sub>                | 3.372 to 5.071 | 0.2972 to 0.6464 | 0.3828 to 0.7584 | 1.663 to 4.125 |
| <b>Goodness of Fit</b>          |                |                  |                  |                |
| Degrees of Freedom              | 9              | 9                | 9                | 9              |
| R <sup>2</sup>                  | 0.9971         | 0.9766           | 0.9836           | 0.9852         |

420 **Supplementary Table 1: Summary of the fits of maximum polymerization rate data in Figure 2 panel B,H and Figure 3 panel F.**  
 421 The best-fit values for the maximum maximum polymerization rate (Max. Poly. Rate<sub>max</sub>) and the concentration of Dip1 (μM)  
 422 needed to get half-maximum max polymerization rate for Dip1 alone or in the presence of Wsp1-VCA, GST-Wsp1-VCA or Wsp1-  
 423 CA. Data points were fit to the following equation: Max poly rate = (max poly rate<sub>max</sub> × [Dip1]) / (K<sub>1/2</sub> + [Dip1]) + y-intercept. The  
 424 y-intercept was set as the maximum polymerization rate in the absence of Dip1 for each condition.

| Reaction # | Description                             | k <sub>on</sub>         | k <sub>off</sub> (s <sup>-1</sup> ) | K <sub>D</sub> (μM)    | Reference     |
|------------|-----------------------------------------|-------------------------|-------------------------------------|------------------------|---------------|
| 1          | Actin dimerization                      | 1.16 × 10 <sup>7</sup>  | 5.88 × 10 <sup>4</sup>              | 5.07 × 10 <sup>3</sup> | This Study    |
| 2          | Actin trimerization                     | 1.16 × 10 <sup>7</sup>  | 9.81 × 10 <sup>3</sup>              | 846                    | This Study    |
| 3          | Actin tetramerization                   | 1.16 × 10 <sup>7</sup>  | 96.9                                | 8.36                   | This Study    |
| 4          | Actin dimer nucleation                  | 1.13 × 10 <sup>-4</sup> |                                     |                        | This Study    |
| 5          | Actin trimer nucleation                 | 1.41 × 10 <sup>-3</sup> |                                     |                        | This Study    |
| 6          | Actin tetramer nucleation               | 5.86 × 10 <sup>-2</sup> |                                     |                        | This Study    |
| 7          | Barbed end elongation                   | 1.16 × 10 <sup>7</sup>  | 1.4                                 | 0.12                   | Pollard 1986  |
| 8          | Arp2/3 binds actin filament             | 150                     | 0.001                               | 6.67                   | Beltzner 2007 |
| 9          | Dip1 binds Arp2/3                       | 1 × 10 <sup>6</sup>     | 9.9                                 | 9.9                    | This Study    |
| 10         | Actin monomer binds Dip1-Arp2/3 nucleus | 1.16 × 10 <sup>7</sup>  | 95200*                              | 8.21 × 10 <sup>3</sup> | This Study    |
| 11         | Dip-bound Arp2/3 nucleation             | 1.8*                    |                                     |                        | This Study    |

425 **Supplementary Table 2: Summary of the values used in models created to fit experimental pyrene actin polymerization**  
 426 **datasets in Figure 3.** Rates were set based on previous published values or optimization of parameters using simple models  
 427 generated in this study, as described in the main text and indicated by the reference. Units for K<sub>on</sub> values are M<sup>-1</sup>s<sup>-1</sup> except for  
 428 reactions 4, 5, 6 and 11 where the units are s<sup>-1</sup>. \* indicates that a range of other values for these parameters are able to fit the  
 429 experimental as well as reported values (See Supplementary Figure 2).

| Reaction # | Description                             | Dip1 Alone Dataset |                        | Dip1 + Wsp1 Dataset |                        |
|------------|-----------------------------------------|--------------------|------------------------|---------------------|------------------------|
|            |                                         | $k_{on}$           | $k_{off}$ ( $s^{-1}$ ) | $k_{on}$            | $k_{off}$ ( $s^{-1}$ ) |
| 9          | Dip1 binds Arp2/3                       | $1 \times 10^6$    | 9.9                    | $1 \times 10^6$     | 2.8                    |
| 10         | Actin monomer binds Dip1-Arp2/3 nucleus | $1.16 \times 10^7$ | 95200*                 | $1.16 \times 10^7$  | 19.6                   |
| 11         | Dip-bound Arp2/3 nucleation             | 1.8*               |                        | 0.0053              |                        |

430 **Supplementary Table 3: Comparison of fitted values for floated parameters for single monomer binding modeling of**  
 431 **experiments in the presence or absence of Wsp1.** The table depicts a subset of Supplementary Table 2 reaction rates that were  
 432 floated in the one monomer binding model to determine the best fit parameter values for datasets with Arp2/3 complex and  
 433 Dip1 alone or in the presence of Wsp1. Units for  $k_{on}$  values are  $M^{-1}s^{-1}$  except for reaction 11 where the units are  $s^{-1}$ . \* indicates  
 434 that a range of other values for these parameters are able to fit the experimental as well as reported values (See  
 435 Supplementary Figure 2).

| Strain    | Genotype                                                                                               |
|-----------|--------------------------------------------------------------------------------------------------------|
| VS698-A1  | <i>h<sup>+</sup> ade6-M210 leu1-32 ura4-D18 his3-D1 fim1-mEGFP-kanMX6</i>                              |
| VS875-1D  | <i>h<sup>+</sup> ade6-216 leu1-32 ura4-D18 his3-D1 fim1-mGFP-kanMX6 wsp1ΔCA-Tadh1-natMX6</i>           |
| VS1981-2D | <i>h<sup>-</sup> ade6-M210 leu1-32 ura4-D18 his3-D1 dip1Δ::ura4+ fim1-mEGFP-kanMX6</i>                 |
| VS2053-2A | <i>h (n.d.) ade6-M210 leu1-32 ura4-D18 his3-D1 wsp1ΔCA-Tadh1-natMX6 dip1Δ::ura4+ fim1-mEGFP-kanMX6</i> |

436 **Supplementary Table 4: *S. pombe* strains used in this study.**

437

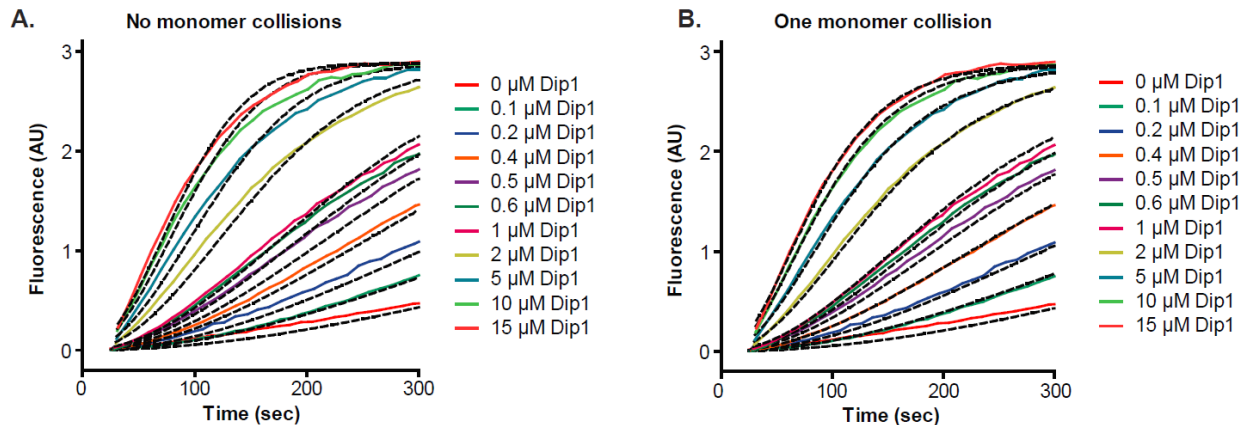

438

439 **Figure 3-figure supplement 1: Simulated and measured time courses of actin polymerization reactions containing Dip1 and**  
 440 **Arp2/3 complex.** **A.** Time courses of polymerization of 3 μM 15% pyrene-labeled actin in the presence of 50 nM SpArp2/3  
 441 complex and a range of Dip1 from 0 to 15 μM (solid lines). Dashed lines indicate the best fits from the no monomer binding  
 442 kinetic model. **B.** Time courses of actin polymerization assays as described in A. Dashed lines over each trace indicate the best  
 443 fits from the one monomer collision COPASI model.

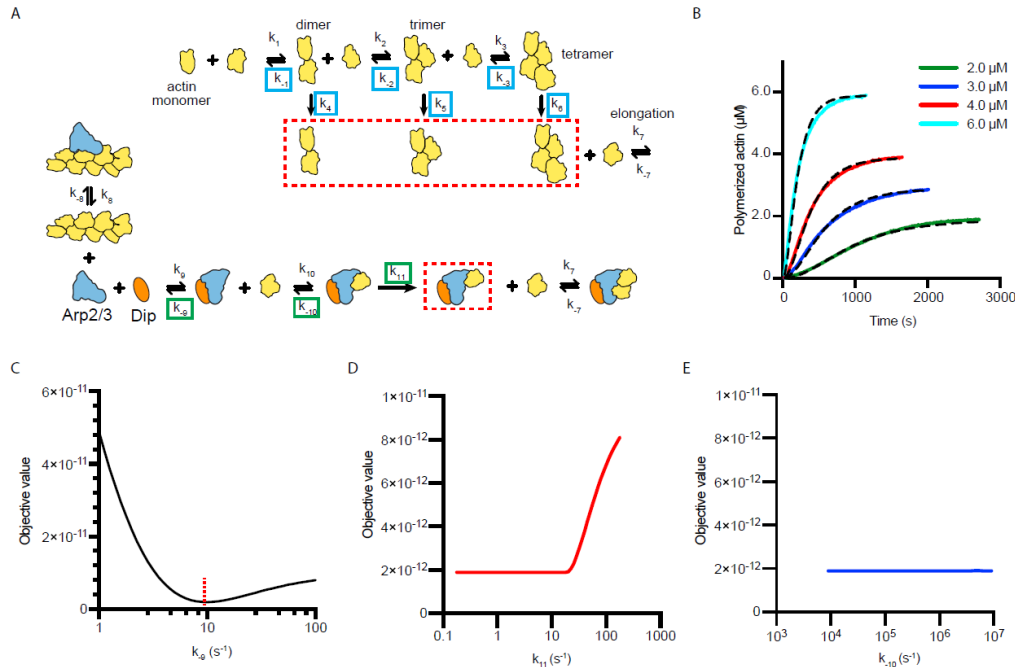

444

445 **Figure 3-figure supplement 2: Full models used to fit actin polymerization time courses in reactions containing Dip1 and**  
 446 **Arp2/3 complex with sensitivity analysis of floated parameters. A.** Kinetic pathways for the spontaneous nucleation of actin  
 447 filaments (top) and for the activation of Arp2/3 complex by Dip1 via the single monomer binding pathway (bottom). Rate  
 448 constants that were floated in the actin alone simulations (see panel B and methods) are boxed in cyan. Rate constants that we  
 449 floated in the Dip1-mediated Arp2/3 complex activation simulations are boxed in green. See methods for more information and  
 450 Supplementary Table 2 for the values used for each reaction parameter in the simulations. **B.** Time courses of polymerization  
 451 of 15% pyrene-labeled actin at the indicated concentrations (solid lines). Dashed lines show simulated polymerization time  
 452 courses based on the spontaneous nucleation and elongation model depicted in panel A. **C.** Plot of the quality of fit (objective  
 453 value) versus  $k_9$  for simulations of the time courses of actin polymerization in the presence of Dip1 and Arp2/3 complex. The  
 454 rate constants  $k_{10}$  and  $k_{11}$  were allowed to float in these simulations. Dashed red line shows the value for the best fit. **D.** Plot of  
 455 the quality of fit (objective value) versus  $k_{11}$  for simulations of the time courses of actin polymerization in the presence of Dip1  
 456 and Arp2/3 complex. The rate constants  $k_9$  and  $k_{10}$  were allowed to float in these simulations. Note that a range of values of  
 457  $k_{11}$  fit the data. **E.** Plot of the objective value of the fit versus  $k_{10}$  for simulations of the time courses of actin polymerization  
 458 in the presence of Dip1 and Arp2/3 complex. The rate constants  $k_9$  and  $k_{11}$  were allowed to float in these simulations. Note that a  
 459 range of values of  $k_{10}$  fit the data.

460

461 Video 1: Spinning Disk Microscopy Video of Fim1-GFP in wild type *S. pombe* cells. (Related to Figure 1)  
 462 Scale Bar: 5 μM. 10 fps.

463 Video 2: Spinning Disk Microscopy Video of Fim1-GFP in *dip1Δ S. pombe* cells. (Related to Figure 1) Scale  
 464 Bar: 5 μM. 10 fps.

465 Video 3: Spinning Disk Microscopy Video of Fim1-GFP in *wsp1ΔCA S. pombe* cells. (Related to Figure 1)  
 466 Scale Bar: 5 μM. 10 fps.

467 Video 4: Spinning Disk Microscopy Video of Fim1-GFP in *dip1Δ wsp1ΔCA S. pombe* cells. (Related to  
 468 Figure 1) Scale Bar: 5 μM. 10 fps.

469

470 **Materials and methods**

471

472 **Protein Expression, Purification and Fluorescent Labeling**

473 To purify *S. pombe* Dip1, an N-terminally glutathione S-transferase (GST) tagged Dip1 plasmid  
474 was generated by cloning the full length Dip1 sequence into the pGV67 vector as described previously  
475 (Balzer et al., 2018). The restriction sites chosen for cloning resulted in the presence of a short N-  
476 terminal polypeptide sequence (GSMEFELRRQACGR) on the end of the coding sequence for Dip1 after  
477 cleavage with tobacco etch virus (TEV). To purify Dip1, BL21(DE3) RIL *E. coli* cells transformed with this  
478 pGV67-Dip1 plasmid were grown to an O.D. 595 of 0.6-0.7, induced with 0.4 mM isopropyl 1-thio- $\beta$ -D-  
479 galactopyranoside (IPTG), and incubated overnight at 22°C. Cells were lysed by sonication in lysis buffer  
480 (20 mM Tris pH 8.0, 140 mM NaCl, 2 mM EDTA, 1 mM dithiothreitol (DTT), 0.5 mM phenylmethylsulfonyl  
481 fluoride (PMSF), and protease inhibitor tablets (Roche)) and then clarified by centrifugation (JA-20 rotor  
482 (Beckman), 18,000 rpm, 25 minutes, 4°C). The supernatant was pooled and loaded onto a 10 mL  
483 glutathione sepharose 4B (GS4B) column equilibrated in GST-binding buffer (20 mM Tris pH 8.0, 140 mM  
484 NaCl, 2 mM EDTA, 1 mM DTT). The column was then washed with GST-binding buffer until no protein  
485 was detected in the flow through (~10 CV). Protein was eluted with 20 mM Tris pH 8.0, 140 mM NaCl  
486 and 50 mM glutathione. Fractions containing GST-Dip1 were pooled and dialyzed overnight against 20  
487 mM Tris pH 8.0, 50 mM NaCl and 1 mM DTT at 4°C in the presence of TEV protease (25:1 ratio of GST-  
488 Dip1 to TEV protease (by mass)). The dialysate was loaded onto a 6 mL Resource Q column equilibrated  
489 in Q<sub>A</sub> buffer (20 mM Tris pH 8.0, 50 mM NaCl, 1 mM DTT) and eluted over a 20 column volume gradient  
490 to 100 % Q<sub>B</sub> buffer (20 mM Tris pH 8.0, 500 mM NaCl, 1 mM DTT). The protein was concentrated in a 10k  
491 MWCO Amicon-Ultra centrifugal filter (Millipore Sigma) and loaded onto a Superdex 200 HiLoad 16/60  
492 gel filtration column equilibrated in 20 mM Tris pH 8.0, 100 mM NaCl and 1 mM DTT. Fractions  
493 containing pure Dip1 were pooled and flash frozen in liquid nitrogen. The final concentration of *S.*

494 *pombe* Dip1 was determined by the absorbance at 280 nm using an extinction coefficient of 36,330 M<sup>-1</sup>  
495 cm<sup>-1</sup>.

496 The Dip1 construct used for site specific labeling with the cysteine-reactive Alexa Fluor 568 C5  
497 maleimide (Thermo Fisher) had the six endogenous cysteine residues in Dip1 mutated to alanine and a  
498 single cysteine added to the short N-terminal polypeptide sequence on the end of the coding sequence  
499 as previously described (Balzer et al., 2018). Expression and purification of this Dip1 mutant was  
500 identical to the wild type purification until the protein was loaded onto the Superdex 200 HiLoad 16/60  
501 gel filtration column. To increase labeling efficiency, the size exclusion column was equilibrated in 20  
502 mM HEPES pH 7.0 and 50 mM NaCl before loading and eluting the concentrated protein. Peak fractions  
503 containing Dip1 were pooled and concentrated to 40 μM for labeling. A 10 mM solution of Alexa Fluor  
504 568 C5 maleimide dye in water was added dropwise to the protein while stirring at 4°C until the solution  
505 reached a 10 to 40 molar excess of dye to protein. After 12-16 hours the reaction was quenched by  
506 dialyzing against 20 mM Tris pH 8.0, 50 mM NaCl, and 1 mM DTT for 24 hours. Labeled Dip1 was loaded  
507 onto a Hi-Trap desalting column and the peak fractions were pooled and flash frozen in liquid nitrogen.  
508 The final concentration of Alexa Fluor 568 dye was determined by measuring the absorbance at 575 nm  
509 and dividing this by 92,009 M<sup>-1</sup>cm<sup>-1</sup>, the extinction coefficient of the dye. The final concentration of 568-  
510 Dip1 was determined by the following equation:  $\frac{A_{280} - (A_{575} \times 0.403)}{36,330 M^{-1} cm^{-1}}$

511

512 To purify *S. pombe* Wsp1-VCA, residues 497-574 were cloned into the pGV67 vector containing  
513 an N-terminal GST tag followed by a TEV cleavage site. A 5 mL culture of BL21(DE3)-RIL *E. coli* cells  
514 transformed with the pGV67-Wsp1-VCA vector in LB plus 100 μg/mL ampicillin and 35 μg/mL  
515 chloramphenicol was grown overnight at 37 °C. One milliliter of this culture was used to inoculate 50 mL  
516 of LB plus ampicillin and chloramphenicol which was allowed to grow at 37 °C with shaking until turbid.  
517 Ten milliliters of this turbid culture were added to a 2.8 L flask containing 1 L of LB plus ampicillin and

518 chloramphenicol and grown to an O. D. 600 of 0.4-0.6 before inducing by adding IPTG to 0.4 mM. Cells  
519 were allowed to express for 12 to 14 hours at 22 °C before adding EDTA and PMSF to 2 mM and 0.5 mM,  
520 respectively. Cells were then harvested and lysed by sonication in lysis buffer (20 mM Tris pH 8.0, 140  
521 mM NaCl, 2 mM EDTA, 1 mM DTT, 0.5 mM PMSF, and protease inhibitor tablets (Roche)) and then  
522 clarified by centrifugation (JA-20 rotor (Beckman), 18,000 rpm, 25 minutes, 4°C). The clarified lysate was  
523 then loaded onto a 10 mL GS4B column equilibrated in GST-binding buffer (20 mM Tris pH 8.0, 140 mM  
524 NaCl, 2 mM EDTA, 1 mM DTT) and washed with ~10 column volumes of the same buffer. Protein was  
525 eluted with ~3 column volumes of elution buffer (20 mM Tris pH 8.0, 100 mM NaCl, 1 mM DTT, 50 mM  
526 reduced L-glutathione) and fractions containing GST-SpWsp1-VCA were pooled and dialyzed overnight in  
527 3,500 MWCO tubing against 2 L of 20 mM Tris pH 8.0, 50 mM NaCl and 1 mM DTT at 4°C in the presence  
528 of a 25:1 ratio (by mass) of TEV protease to recombinant protein. To purify the GST tagged Wsp1-VCA,  
529 the addition of TEV to the dialysis was omitted. The dialysate was loaded onto a 6 mL Source30Q column  
530 equilibrated in Q<sub>A</sub> buffer (20 mM Tris pH 8.0, 50 mM NaCl, 1 mM DTT) and eluted over a 20 column  
531 volume gradient to 100 % Q<sub>B</sub> buffer (20 mM Tris pH 8.0, 500 mM NaCl, 1 mM DTT). Fractions containing  
532 GST-Wsp1-VCA were concentrated to 1.5 mL and loaded onto a Superdex 75 gel filtration column  
533 equilibrated in 20 mM Tris pH 8.0, 150 mM NaCl, and 1 mM DTT. Fractions containing pure protein were  
534 pooled and concentrated in a 3,500 MWCO Amicon-Ultra centrifugal filter (Millipore Sigma) at 4°C. The  
535 concentrated, pure protein was flash frozen in liquid nitrogen. The final concentration of *S. pombe*  
536 Wsp1-VCA was determined by measuring the absorbance at 280 nm and dividing this by the Wsp1  
537 extinction coefficient of 5,500 M<sup>-1</sup>cm<sup>-1</sup>.

538 To construct an expression plasmid for *S. pombe* Wsp1-CA, residues 519-574 were cloned into  
539 the pGV67 vector containing an N-terminal GST tag followed by a TEV cleavage site. The purification was  
540 carried out as described for *S. pombe* Wsp1-VCA above.



541 To purify *S. pombe* Arp2/3 complex, 10 mL of a turbid culture of *S. pombe* (strain TP150) cells  
542 was added to a 2.8 L flask containing 1 L of YE5S. Cultures were grown for ~12 hours at 30 °C with  
543 shaking followed by the addition of solid YE5S media, equivalent to the mass required for 1 L of liquid  
544 culture, and growth for ~4 more hours. Before harvesting, EDTA was added to a final concentrations of  
545 2 mM. All subsequent steps were carried out at 4 °C. The cultures were centrifuged, and the pellet was  
546 resuspended in 2 mL of lysis buffer (20mM Tris pH 8.0, 50 mM NaCl, 1 mM EDTA, 1mM DTT) per gram of  
547 wet cell pellet, plus 6 protease inhibitor tablets (Roche) per liter of lysis buffer. The resuspended cells  
548 were lysed in a microfluidizer (Microfluidics Model M-110EH-30 Microfluidizer Processor) at 23 kPSI over  
549 5 to 6 passes. After lysis, PMSF was added to 0.5 mM and the lysate was spun down in a JA-10  
550 (Beckman) rotor at 9,000 rpm for 25 minutes. The supernatant was transferred to prechilled 70 mL  
551 polycarbonate centrifuge tubes and spun at 34,000 rpm for 75 minutes in a Fiberlite F37L rotor  
552 (Thermo-Scientific). The pellet was discarded and the supernatant was filtered through cheesecloth into  
553 a prechilled graduated cylinder to determine the volume. Under heavy stirring, 0.243 g of ammonium  
554 sulfate per mL of supernatant was added over approximately 30 minutes. The solution stirred for an  
555 additional 30 minutes, then was pelleted in a Fiberlite F37L rotor at 34,000 rpm for 90 minutes. The  
556 pellet was resuspended in 50 mL of PKME (25 mM PIPES, 50 mM KCl, 1 mM EGTA, 3 mM MgCl<sub>2</sub>, 1 mM  
557 DTT and 0.1 mM ATP) and dialyzed overnight in 50,000 MWCO dialysis tubing against 8 L PKME. The  
558 dialysate was clarified by centrifugation in the Fiberlite F37L rotor at 34,000 rpm for 90 minutes. A 10 ml  
559 column of GS4B beads was equilibrated in GST binding buffer (20 mM Tris pH 8.0, 140 mM NaCl, 1 mM  
560 EDTA, and 1 mM DTT) before it was charged with 15 mg of GST-N-WASP-VCA to make a GST-VCA affinity  
561 column. The charged column was washed with additional binding buffer until no protein was detectable  
562 in the flow through by Bradford assay. The column was then equilibrated in PKME pH 7.0, the  
563 supernatant was loaded at 1 mL per min and the column was washed with additional PKME (~45 mL). A  
564 second wash with PKME + 150 mM KCl was done until no protein was detected in the flow through by

565 Bradford assay (~30 mL). Protein was eluted with PKME + 1 M NaCl into ~2 mL fractions until no protein  
566 was detected by a Bradford assay (~30mL). Fractions containing Arp2/3 complex were pooled and  
567 dialyzed overnight in 50,000 MWCO dialysis tubing against 2 L of Q<sub>A</sub> buffer (10 mM PIPES, 25 mM NaCl,  
568 0.25 mM EGTA, 0.25 mM MgCl<sub>2</sub>, pH 6.8 with KOH). Arp2/3 complex was further purified by ion  
569 exchange chromatography on an FPLC using a 1mL MonoQ column with a linear gradient of Q<sub>A</sub> buffer to  
570 100% Q<sub>B</sub> buffer (10 mM PIPES, 500 mM NaCl, 0.25 mM EGTA, 0.25 mM MgCl<sub>2</sub>, pH 6.8 with KOH) over 40  
571 column volumes. Fractions containing Arp2/3 complex were pooled and dialyzed overnight in 50,000  
572 MWCO dialysis tubing against Tris pH 8.0, 50 mM NaCl and 1 mM DTT. The dialysate was concentrated  
573 to 1.5 mL in a 30,000 MWCO concentrator tube (Sartorius Vivaspin Turbo 15 #VS15T21) using the  
574 Fiberlite F13B rotor at 2,500 rpm over several 5-10 minute cycles. Between each cycle the solution was  
575 mixed by gentle pipetting. The concentrated sample was loaded on a Superdex 200 HiLoad 16/60 gel  
576 filtration column equilibrated in Tris pH 8.0, 50 mM NaCl, and 1 mM DTT. Fractions containing pure  
577 Arp2/3 complex were concentrated as described above and the final concentration was determined by  
578 measuring the absorbance at 290 nm and dividing by 139,030 M<sup>-1</sup>cm<sup>-1</sup>, the extinction coefficient ( $\epsilon_{290}$ ) of  
579 Arp2/3 complex, before flash freezing.

580 Biotin-inactivated myosin was prepared by reacting 2 mg of rabbit skeletal muscle myosin  
581 (Cytoskeleton Cat # MYO2) with 5  $\mu$ L of 250 mM EZ-Link-Maleimide-PEG11-Biotin dissolved in DMSO.  
582 The labeling reaction was carried out in 500  $\mu$ L reaction buffer (20 mM HEPES pH 8.0, 500 mM KCl, 5  
583 mM EDTA, 1  $\mu$ M ATP and 1 mM MgCl<sub>2</sub>) on ice for 6 hours. The Biotin-myosin was then dialyzed against  
584 0.5 L of storage buffer (20 mM Imidazole pH 7.0, 500 mM KCl, 5 mM EDTA, 1 mM DTT and 50% glycerol)  
585 using a 3500 MWCO dialysis thimble (Thermofisher Slide-A-Lyzer MINI dialysis unit 0069550). The final  
586 volume of biotin-myosin was measured, and the concentration was determined based on 1.85 mg/mL  
587 equaling 3.86  $\mu$ M. Biotin-myosin was stored at -20 °C.

588 Actin was purified using a modified method based on the one described by Spudich and Watt  
589 (1971). Five grams of rabbit muscle acetone powder was resuspended in 100 mL G buffer (2 mM Tris pH  
590 8.0, 0.2 mM ATP, 0.5 mM DTT, 0.1 mM CaCl<sub>2</sub> and 1 mM sodium azide (NaN<sub>3</sub>)) and stirred at 4 °C for 30  
591 minutes. All additional steps are carried out at 4 °C. Resuspended rabbit muscle was centrifuged for 25  
592 minutes at 16,000 rpm in a Beckman JA-20 rotor and the supernatant was filtered through glass wool  
593 into a prechilled graduated cylinder. The pellet was resuspended in an additional 100 mL G buffer,  
594 pelleted as described above and the supernatant was filtered through glass wool and pooled with the  
595 original supernatant. The total volume was measured and the solution was brought to 50 mM KCl and 2  
596 mM MgCl<sub>2</sub> by adding 25 μL 2 M KCl and 2 μL 1 M MgCl<sub>2</sub> per 1 mL of supernatant with stirring. The  
597 solution was allowed to stir for 1 hour to polymerize actin. After one hour, 0.056 g KCl per 1 mL of  
598 original supernatant volume was added to bring the solution to 0.8 M KCl. The solution was stirred for  
599 an additional 30 minutes to dissociate tropomyosin before it was pelleted in a Beckman 70Ti rotor at  
600 31,700 rpm for 2 hours. The supernatant was discarded and 2/3 of the pellet was homogenized in 5 mL  
601 of G buffer using a Dounce homogenizer and dialyzed in 1 L of G buffer to begin to depolymerize actin  
602 filaments. The remaining 1/3 of the pellet was homogenized in 4 ml of labeling buffer (25 mM Tris pH  
603 7.5, 100 mM KCl, 0.3 mM ATP, 2 mM MgSO<sub>4</sub> and 3 mM Sodium Azide (NaN<sub>3</sub>)) and dialyzed against 1 L of  
604 labeling buffer for at least 4 hours to remove DTT. The concentration of actin was then measured  
605 ( $[actin] = A_{290}/0.0266 \mu M^{-1}cm^{-1}$ ) and actin was diluted to 23.8 μM (1 mg/mL). A 4 to 7 molar excess of N-  
606 (1-pyrene)iodoacetimide was added to the actin dropwise with stirring. The labeling reaction proceeded  
607 for ~14 hours, covered from light. Pyrene-labeled actin was pelleted using a Beckman 90Ti rotor at  
608 36,200 rpm for 2 hours and then homogenized in 1.5 mL G buffer and dialyzed against 1 L G buffer while  
609 protected from light. Both unlabeled and pyrene-labeled actin were dialyzed against G buffer for 1.5 to 2  
610 days with at least 3 exchanges of dialysis buffer. Following dialysis, depolymerized actin was centrifuged  
611 in a Beckman 90 Ti rotor at 36,200 rpm for 2 hours to pellet out any polymerized actin and the top 80%

612 of the supernatant was the gel filtered using S-300 resin and G buffer. Fractions of 3 to 4 mL were  
613 collected over ~300 mL G buffer and the peak fraction was identified using a Bradford assay. The  
614 concentration of unlabeled actin was determined using the following equation:  $[\text{Actin}, \mu\text{M}] = A_{290} * 38.5$   
615  $\mu\text{M}/\text{OD}$ . The concentration of pyrene-labeled actin was determined using the following equation:  
616  $[\text{Pyrene-labeled actin}, \mu\text{M}] = (A_{290} - (0.127 * A_{344})) * 38.5 \mu\text{M}/\text{OD}$ . The labeling percentage of pyrene-  
617 labeled actin was determined by dividing the pyrene-labeled actin concentration by the concentration of  
618 pyrene ( $[\text{pyrene}, \mu\text{M}] = A_{344} * 45.5 \mu\text{M}/\text{OD}$ ). Actin was stored at 4 °C with pyrene-labeled actin covered  
619 in foil to protect from light.

620 Oregon Green labeled actin was purified as pyrene actin until resuspension in labeling buffer.  
621 Actin was resuspended in 2 mL labeling buffer (25 mM Inidazole pH 7.5, 100 mM KCl, 0.3 mM ATP, 2 mM  
622  $\text{MgCl}_2$ , and 3 mM Sodium Azide ( $\text{NaN}_3$ ) and dialyzed against 1 L of labeling buffer for at least 4 hours to  
623 remove DTT. The concentration of actin was then measured ( $[\text{actin}] = A_{290}/0.0266 \mu\text{M}^{-1}\text{cm}^{-1}$ ) and actin  
624 was diluted to 23.8  $\mu\text{M}$  (1 mg/mL). A 10 to 12 molar excess of Oregon Green 488 Maleimide (Invitrogen  
625 O-6034) was added to the actin dropwise with stirring. The labeling reaction proceeded for ~14 hours,  
626 covered from light. Oregon Green labeled actin was centrifuged, homogenized and gel filtered as with  
627 pyrene actin. The concentration of pyrene-labeled actin was determined using the following equation:  
628  $[\text{Oregon Green labeled actin}, \mu\text{M}] = (A_{290} - (0.16991 * A_{491})) * 38.5 \mu\text{M}/\text{OD}$ . The labeling percentage of  
629 Oregon Green labeled actin was determined by dividing the Oregon Green labeled actin concentration  
630 by the concentration of Oregon Green dye ( $[\text{Oregon Green 488 Maleimide}, \mu\text{M}] = A_{491} / 0.081 \mu\text{M}^{-1}\text{cm}^{-1}$ ).  
631 Oregon Green labeled actin was stored at 4 °C covered in foil to protect from light.

632

### 633 **TIRF microscopy slide preparation**

634 TIRF flow chambers were constructed as previously described with slight modifications (Kuhn  
635 and Pollard, 2005). All following cleaning steps were carried out at room temperature. Coverslips (24 x

636 60 #1.5) were cleaned in Coplin jars by sonicating in acetone followed by 1 M KOH for 25 min each, with  
637 a deionized water rinse between each sonication step. Coverslips were then rinsed twice with methanol  
638 and aminosilanized by incubating in a 1% APTES (Sigma), 5 % acetic acid in methanol solution for 10 min  
639 before sonicating for 5 min, and then incubating for an additional 15 min. Coverslips were then rinsed  
640 with 2 volumes of methanol followed by thorough flushing with deionized water. After air drying, TIRF  
641 chambers were created by pressing two pieces of double-sided tape onto a cleaned coverslip with a 0.5  
642 cm wide gap between them. A glass microscope slide was then placed on top of the coverslip and tape  
643 perpendicularly to create a cross-shape forming a chamber in the middle with a volume of ~14  $\mu$ L.  
644 Chambers were passivated by flowing in 300 mg/mL methoxy PEG succinimidyl succinate, MW5000  
645 (JenKem) containing 1-3% biotin-PEG NHS ester, MW5000 (JenKem) dissolved in 0.1 M  $\text{NaHCO}_3$  pH 8.3  
646 and incubating for 4-5 hours. Excess PEG was washed out with 0.1 M  $\text{NaHCO}_3$  pH 8.3 before flowing  
647 deionized water into chambers for storage. Chambers were stored at 4 °C for less than 1 week.  
648 Immediately prior to imaging, 1  $\mu$ M NeutrAvidin (ThermoFisher) was added to chambers and incubated  
649 for 8 minutes followed by 8 minutes with 50-150 nM biotin inactivated myosin (Cytoskeleton, Inc), both  
650 prepared in 50 mM Tris pH 7.5, 600 mM NaCl. Chambers were washed 2 times with 20 mg/mL BSA in 50  
651 mM Tris pH 7.5, 600 mM NaCl followed by 2 washes with 20 mg/mL BSA in 50 mM Tris pH 7.5, 150 mM  
652 NaCl. Chambers were finally pre-incubated with TIRF buffer (10 mM Imidazole pH 7.0, 1 mM  $\text{MgCl}_2$ , 1  
653 mM EGTA, 50 mM KCl, 100 mM DTT, 0.2 mM ATP, 25 mM Glucose, 0.5 % Methylcellulose (400 cP at 2%),  
654 0.02 mg/mL Catalase (Sigma) and 0.1 mg/mL Glucose Oxidase (MP Biomedicals)) after which point they  
655 were ready to add reaction mixture.

656

### 657 **Actin Polymerization Reactions in TIRF chambers**

658 In a typical reaction, 1  $\mu$ L of 2.5 mM  $\text{MgCl}_2$  and 10 mM EGTA was mixed with 5  $\mu$ L of 9  $\mu$ M 33%  
659 Oregon Green labeled actin and incubated for 2 minutes. Four microliters of the actin solution were

660 then added to 16  $\mu$ L of a solution containing 1.25x TIRF buffer and any other proteins. Reactions were  
661 imaged on a Nikon TE2000 inverted microscope equipped with a 100x 1.49 numerical aperture TIRF  
662 objective, 50 mW 488 nm and 561 nm Sapphire continuous wave solid state laser lines (Coherent), a  
663 dual band TIRF (zt488/561rpc) filter cube (Chroma C143315), and a 1x-1.5x intermediate magnification  
664 module. Images were collected using an 512x512 pixel EM-CCD camera (iXon3, Andor). For two color  
665 reactions, typical imaging conditions were 50 ms exposures with the 488 nm laser (set to 5 mW) and 100  
666 ms exposures with the 561 nm laser (set to 35 mW) for 1 s intervals. The camera EM gain was set to 200.  
667 The concentration of 568-Dip1 was kept in the low nanomolar range in all assays to prevent high  
668 backgrounds of non-specifically adsorbed 568-Dip1 from obscuring Dip-Arp2/3 filament nucleation  
669 events.

670

671

### 672 **Pyrene actin polymerization assays**

673 In a typical reaction, 2  $\mu$ L of 10X ME buffer (5 mM  $MgCl_2$ , 20 mM EGTA) was added to 20  $\mu$ L of  
674 15% pyrene labeled actin and incubated for 2 minutes in 96-well flat bottom black polystyrene assay  
675 plates (Corning 3686). To initiate the reaction, 78  $\mu$ L of buffer containing all other proteins was added to  
676 the actin wells using a multichannel pipette. This brought the final buffer concentration in the reaction  
677 to 10 mM Imidazole pH 7.0, 50 mM KCl, 1 mM EGTA, 1 mM  $MgCl_2$ , 200  $\mu$ M ATP and 1 mM DTT.  
678 Polymerization of actin was measured by exciting pyrene actin at 365 nm and monitoring the emission  
679 at 407 nm using a TECAN Safire 2 plate reader. The maximum polymerization rate of pyrene actin  
680 polymerization assays was determined by measuring the slope of each curve at each time point and  
681 converting from RFU/sec to actin (nM)/sec by assuming that the actin filament concentration was zero  
682 at the minimum fluorescence value and 0.1  $\mu$ M actin was unpolymerized at the maximum fluorescence.  
683 The maximum polymerization rate was plotted for a series of reactions with increasing concentrations of

684 Dip1 and fixed concentrations of all other proteins. For these plots, data points were fit to the following  
685 equation:  $\text{Max poly rate} = (\text{max poly rate}_{\text{max}} \times [\text{Dip1}]) / (K_{1/2} + [\text{Dip1}]) + \text{y-intercept}$  where  $K_{1/2}$  represents  
686 the [Dip1] needed to get half-maximum max polymerization rate and the y-intercept represents the  
687 maximum polymerization rate in the absence of Dip1. Note that Fig. 2A shows only a subset of the  
688 assays while the maximum polymerization rates of the entire data set are shown in Fig. 2B. See  
689 Supplementary Table 1 for details on fits.

690

### 691 **Quantification of the number of Dip1-Arp2/3 nucleated actin filaments**

692 The percentage of Dip1-Arp2/3 complex nucleated actin filaments was determined by counting  
693 the number of actin filament pointed ends bound by 568-Dip1 in Oregon Green labeled actin  
694 polymerization assays imaged using TIRF microscopy (Balzer 2018). The quantification was performed on  
695 a region of interest from the movie frame that corresponded to 2 minutes and 30 seconds from the  
696 initiation of the reaction. All pointed ends present in the quantified frame were tracked from their initial  
697 appearance to ensure accuracy in 568-Dip1 pointed end binding determination. The number of pointed  
698 ends bound by 568-Dip1 was divided by the total number of pointed ends in the region of interest. At  
699 least 4 replicate actin polymerization assays were quantified for each condition. The statistical  
700 significance of the data for datasets of only two conditions was tested by Student's t-test in GraphPad  
701 Prism. The statistical significance for datasets of more than two conditions was tested by one-way  
702 ANOVA with Tukey's post-hoc test in GraphPad Prism. Both tests were two tailed and the significance  
703 values are reported in the figure legends.

### 704 **Modeling of actin polymerization assays**

705 All modeling was carried out using the open source software application Complex Pathway  
706 Simulator (COPASI)(Hoops et al., 2006). Fluorescence values from time courses of polymerization of 3  
707  $\mu\text{M}$  15% pyrene-labeled actin in the presence of indicated proteins were converted to .txt files using a

708 custom MatLab script and loaded into COPASI software. The actin filament concentrations were  
709 determined by assuming 0.1  $\mu\text{M}$  actin was unpolymerized at equilibrium (Pollard, 1986). Optimization of  
710 reaction parameters was carried out by simultaneously fitting all traces from a reaction set, using the  
711 Genetic algorithm method in the parameter estimation module.

712 Models were built by identifying interactions between the components in polymerization assays  
713 to build up a set of reactions to describe the polymerization. For many parameters included in our set of  
714 reactions, we were able to use previously measured rate constants (See Supplementary Table 2). Rate  
715 constants that had not been previously measured were allowed to float. We assumed pointed end  
716 elongation was negligible. To limit the number of floated parameters in a given simulation, we first  
717 conducted polymerization assays with actin alone at a range of concentrations (2-6  $\mu\text{M}$ ), and then  
718 determined a reaction pathway and rate constants that could accurately describe spontaneous  
719 nucleation and polymerization of actin alone (see Supplementary Figure 2). The on rates for actin  
720 dimerization, trimerization and tetramerization were fixed at  $1.16 \times 10^7 \text{ M}^{-1}\text{s}^{-1}$ , the observed on rate for  
721 actin monomers binding to filament barbed ends. To simplify the models, steps that created a nucleus  
722 were considered irreversible and nuclei were modeled as catalysts that convert monomeric actin to  
723 filamentous actin, as previously described (Beltzner and Pollard, 2008; Helgeson and Nolen, 2013). We  
724 note that the best fits for spontaneous nucleation and elongation of actin filaments were obtained using  
725 a model in which either a dimer, trimer, or tetramer could serve as the nucleus. This pathway is distinct  
726 from models we previously used to simulate spontaneous nucleation and elongation in actin alone  
727 reactions (Helgeson and Nolen, 2013). To model reactions containing Dip1 and Arp2/3 complex (Fig. 3),  
728 we fixed the rate constants for the spontaneous nucleation of actin at the values determined in  
729 reactions containing actin alone, except for  $k_{-1}$ , which was re-evaluated based on an “actin alone”  
730 polymerization time course measured at the same time (in the same set) as the Dip1 and Arp2/3-  
731 containing reactions. We used the objective value, or the normalized mean square weighted sum of



732 squares, as a measure of how well the model fit the experimental data. The mean square weighted sum  
733 of squares (MSS) was determined by the following equation:  $MSS = \sum \omega * (x - y)^2$  where  $\omega = \frac{1}{\langle x^2 \rangle}$   
734 and x and y correspond to the experimental point in the dataset and simulated value, respectively.

735

### 736 **Yeast strain construction**

737 *S. pombe* strains were constructed by PCR-based gene tagging and genetic crossing (see Table  
738 S4). Deletions cassettes with selectable markers were introduced into endogenous chromosomal loci by  
739 homologous recombination of PCR-amplified gene tagging modules (Bähler et al., 1998; Wach et al.,  
740 1994). Amplified modules were introduced into cells by lithium acetate transformation (Keeney and  
741 Boeke, 1994). Successful integrants were isolated based on selectable markers and confirmed by PCR  
742 and sequencing.

743 Fim1-mEGFP expressing cells were constructed in a previous study (Wu and Pollard, 2005). The  
744 *dip1Δ* strain was constructed by replacing the gene open reading frame with a *ura4<sup>+</sup>* cassette amplified  
745 from KS-ura4 (Bähler et al., 1998). The C-terminal truncation of Wsp1 was constructed by replacing the  
746 sequence encoding the CA domain (aa 541-574) in the endogenous *wsp1* locus with the *stop codon-*  
747 *Tadh1-natMX6* cassette amplified from a custom-made pFA6a-GFP-natMX6 plasmid.

748 Strains combining two or more deletion or tagged alleles were constructed by standard genetic  
749 crosses on Malt Extract (ME) plates and tetrad dissection on YES plates followed by screening for  
750 wanted gene combinations by replica plating onto appropriate selective plates, microscopy and PCR  
751 diagnostics.

752

### 753 **Live cell imaging**

754 Imaging was performed on an UltraView VoX Spinning Disc Confocal System (PerkinElmer)  
755 mounted on a Nikon Eclipse Ti-E microscope with a 100x/1.4 NA PlanApo objective, equipped with a

756 Hamamatsu C9100-50 EMCCD camera, and controlled by Volocity (PerkinElmer) software. Stably  
757 integrated *S. pombe* strains were grown to  $OD_{595} = 0.2\text{--}1.0$  in liquid YES medium (Sunrise) while shaking  
758 in the dark at 25°C over 2 days. For microscopy, cells from 0.5–1 ml of culture were collected by a brief  
759 centrifugation in a microfuge at 2,000 g and 5  $\mu$ l of partly re-suspended pellet was placed onto a pad of  
760 25% gelatin in EMM on a glass slide, covered by a coverslip and sealed with VALAP (1:1:1  
761 vaseline:lanolin:paraffin mix). Samples were imaged after a 5-min incubation to allow for partial  
762 depolarization of actin patches. For time-lapse imaging, single-color images in a cell medial plane were  
763 taken every second for 60 s. Z-series of images spanning the entire cell width were captured at 0.4- $\mu$ m  
764 intervals.

765

#### 766 **Live cell image analysis**

767 Image analysis was performed in ImageJ (National Institutes of Health). To make sure that  
768 different mutant backgrounds did not alter the expression levels of tagged proteins and that imaging  
769 conditions remained stable throughout an imaging session, for each dataset, we measured average  
770 background-subtracted whole-cell intensities, which correspond to the tagged protein expression levels.  
771 For each time series, we measured whole cell intensities of five cells, subtracted these values for either  
772 extracellular background or the intensities of untagged wild-type cells, and averaged the background-  
773 subtracted values at each time point. All strains within each dataset had statistically similar whole-cell  
774 intensities.

775 The intensities and positions of fluorescent protein-tagged markers in individual endocytic actin  
776 patches were manually tracked throughout lifetime of each patch using a circular region of interest (ROI)  
777 with a 10-pixel diameter. Mean fluorescence intensities of patches were subtracted for mean  
778 cytoplasmic intensities measured in cell areas away from patches, and distances traveled by patches  
779 from the original positions were calculated. Time courses of background subtracted intensities and

780 distances from origin for individual patches were aligned to the time of peak intensity (time=0) and  
781 averaged at each time point.

782 Percent of internalized patches was measured by following fates of all patches present in frame  
783 25 of time-lapse movies in a single medial plane. A patch was counted as internalized if it shifted from its  
784 original position by more than two pixels and, for each cell, the number of internalized patches was  
785 divided by the total number of analyzed patches. Percent internalization was measured and averaged  
786 from 6 WT, 6 *wsp1Δ* cells, 12 *dip1Δ*, and 12 *wsp1ΔCA dip1Δ* cells.

787 To measure patch density, all patches in 5 cells were counted in a z-series taken at a single time  
788 point. The area of the cell was measured at the medial focal plane and the patch density was calculated  
789 by dividing the number of patches by the cell area. Patch initiation rates (patches/ $\mu\text{m}^2/\text{s}$ ) were  
790 measured by counting patches that newly appeared during the first 20 seconds of time-lapse movies  
791 taken in a single medial cell plane and dividing the number of new patches by cell area and 20 s. The  
792 patches that were already present in frame 1 were excluded from the count.

793

#### 794 **Statistical Analysis**

795 All fluorescence intensity, distance, patch initiation, and patch density values are displayed as  
796 mean  $\pm$  SEM. The data are from single imaging experiment where all strains were imaged under identical  
797 conditions. The number of cells and patches analyzed are indicated in figure legends. The statistical  
798 significance for datasets of more than two conditions was tested by one-way ANOVA with Tukey's post-  
799 hoc test in GraphPad Prism. Both tests were two tailed and the significance values are reported in  
800 figures and figure legends.

801

#### 802 **Acknowledgements**

803 Research reported in this publication was supported by the National Institute of General Medical  
804 Sciences of the NIH under award number R35GM136319 (B.J.N.) and T32 GM007759 (to C.J.B. and  
805 L.A.H.) and by the American Heart Association , grant no. 18PRE33960110 (C.J.B.). We thank Andrew  
806 Wagner for generating the *dip1Δ S. pombe* strain and for help with the two-color TIRF microscopy  
807 experiments.

808

## 809 Competing Interests

810 We have no competing interests to report.

811

## 812 References

- 813 Achard V, Martiel J-L, Michelot A, Guérin C, Reymann A-C, Blanchoin L, Boujemaa-Paterski R. 2010. A  
814 “Primer”-Based Mechanism Underlies Branched Actin Filament Network Formation and Motility.  
815 *Current Biology* **20**:423–428. doi:10.1016/j.cub.2009.12.056
- 816 Arasada R, Pollard TD. 2011. Distinct roles for F-BAR proteins Cdc15p and Bzz1p in actin polymerization  
817 at sites of endocytosis in fission yeast. *Curr Biol* **21**:1450–1459. doi:10.1016/j.cub.2011.07.046
- 818 Bähler J, Wu JQ, Longtine MS, Shah NG, McKenzie A, Steever AB, Wach A, Philippsen P, Pringle JR. 1998.  
819 Heterologous modules for efficient and versatile PCR-based gene targeting in  
820 *Schizosaccharomyces pombe*. *Yeast* **14**:943–951. doi:10.1002/(SICI)1097-  
821 0061(199807)14:10<943::AID-YEA292>3.0.CO;2-Y
- 822 Balzer CJ, Wagner AR, Helgeson LA, Nolen BJ. 2019. Single-Turnover Activation of Arp2/3 Complex by  
823 Dip1 May Balance Nucleation of Linear versus Branched Actin Filaments. *Current Biology*  
824 **29**:3331-3338.e7. doi:10.1016/j.cub.2019.08.023
- 825 Balzer CJ, Wagner AR, Helgeson LA, Nolen BJ. 2018. Dip1 Co-opts Features of Branching Nucleation to  
826 Create Linear Actin Filaments that Activate WASP-Bound Arp2/3 Complex. *Current Biology*  
827 **28**:3886-3891.e4. doi:10.1016/j.cub.2018.10.045
- 828 Banjade S, Rosen MK. 2014. Phase transitions of multivalent proteins can promote clustering of  
829 membrane receptors. *eLife* **3**. doi:10.7554/eLife.04123
- 830 Basu R, Chang F. 2011. Characterization of dip1p reveals a switch in Arp2/3-dependent actin assembly  
831 for fission yeast endocytosis. *Curr Biol* **21**:905–916. doi:10.1016/j.cub.2011.04.047
- 832 Beltzner CC, Pollard TD. 2008. Pathway of actin filament branch formation by Arp2/3 complex. *J Biol*  
833 *Chem* **283**:7135–7144. doi:10.1074/jbc.M705894200
- 834 Berro J, Pollard TD. 2014a. Local and global analysis of endocytic patch dynamics in fission yeast using a  
835 new “temporal superresolution” realignment method. *Mol Biol Cell* **25**:3501–3514.  
836 doi:10.1091/mbc.E13-01-0004
- 837 Berro J, Pollard TD. 2014b. Local and global analysis of endocytic patch dynamics in fission yeast using a  
838 new “temporal superresolution” realignment method. *Mol Biol Cell* **25**:3501–3514.  
839 doi:10.1091/mbc.E13-01-0004

- 840 Boczkowska M, Rebowski G, Kast DJ, Dominguez R. 2014. Structural analysis of the transitional state of  
841 Arp2/3 complex activation by two actin-bound WCAs. *Nat Commun* **5**:3308.  
842 doi:10.1038/ncomms4308
- 843 Galletta BJ, Chuang DY, Cooper JA. 2008. Distinct Roles for Arp2/3 Regulators in Actin Assembly and  
844 Endocytosis. *PLOS Biology* **6**:e1. doi:10.1371/journal.pbio.0060001
- 845 Goley ED, Welch MD. 2006. The ARP2/3 complex: an actin nucleator comes of age. *Nat Rev Mol Cell Biol*  
846 **7**:713–726. doi:10.1038/nrm2026
- 847 Goode BL, Eskin JA, Wendland B. 2015. Actin and Endocytosis in Budding Yeast. *Genetics* **199**:315–358.  
848 doi:10.1534/genetics.112.145540
- 849 Helgeson LA, Nolen BJ. 2013. Mechanism of synergistic activation of Arp2/3 complex by cortactin and N-  
850 WASP. *Elife* **2**:e00884. doi:10.7554/eLife.00884
- 851 Hetrick B, Han MS, Helgeson LA, Nolen BJ. 2013. Small molecules CK-666 and CK-869 inhibit actin-related  
852 protein 2/3 complex by blocking an activating conformational change. *Chem Biol* **20**:701–712.  
853 doi:10.1016/j.chembiol.2013.03.019
- 854 Higgs HN, Pollard TD. 2001. Regulation of Actin Filament Network Formation Through ARP2/3 Complex:  
855 Activation by a Diverse Array of Proteins. *Annual Review of Biochemistry* **70**:649–676.  
856 doi:10.1146/annurev.biochem.70.1.649
- 857 Hoops S, Sahle S, Gauges R, Lee C, Pahle J, Simus N, Singhal M, Xu L, Mendes P, Kummer U. 2006.  
858 COPASI—a COmplex PATHway Simulator. *Bioinformatics* **22**:3067–3074.  
859 doi:10.1093/bioinformatics/btl485
- 860 Hurst V, Shimada K, Gasser SM. 2019. Nuclear Actin and Actin-Binding Proteins in DNA Repair. *Trends*  
861 *Cell Biol* **29**:462–476. doi:10.1016/j.tcb.2019.02.010
- 862 Keeney JB, Boeke JD. 1994. Efficient targeted integration at leu1-32 and ura4-294 in  
863 *Schizosaccharomyces pombe*. *Genetics* **136**:849–856.
- 864 Kuhn JR, Pollard TD. 2005. Real-Time Measurements of Actin Filament Polymerization by Total Internal  
865 Reflection Fluorescence Microscopy. *Biophys J* **88**:1387–1402. doi:10.1529/biophysj.104.047399
- 866 Lacy MM, Ma R, Ravindra NG, Berro J. 2018. Molecular mechanisms of force production in clathrin-  
867 mediated endocytosis. *FEBS Lett* **592**:3586–3605. doi:10.1002/1873-3468.13192
- 868 Li P, Banjade S, Cheng H-C, Kim S, Chen B, Guo L, Llaguno M, Hollingsworth JV, King DS, Banani SF, Russo  
869 PS, Jiang Q-X, Nixon BT, Rosen MK. 2012. Phase transitions in the assembly of multivalent  
870 signalling proteins. *Nature* **483**:336–340. doi:10.1038/nature10879
- 871 Luan Q, Liu S-L, Helgeson LA, Nolen BJ. 2018a. Structure of the nucleation-promoting factor SPIN90  
872 bound to the actin filament nucleator Arp2/3 complex. *The EMBO Journal* **37**:e100005.  
873 doi:10.15252/embj.2018100005
- 874 Luan Q, Zelter A, MacCoss MJ, Davis TN, Nolen BJ. 2018b. Identification of Wiskott-Aldrich syndrome  
875 protein (WASP) binding sites on the branched actin filament nucleator Arp2/3 complex. *Proc*  
876 *Natl Acad Sci USA* **115**:E1409–E1418. doi:10.1073/pnas.1716622115
- 877 Machesky LM, Mullins RD, Higgs HN, Kaiser DA, Blanchoin L, May RC, Hall ME, Pollard TD. 1999. Scar, a  
878 WASp-related protein, activates nucleation of actin filaments by the Arp2/3 complex. *Proc Natl*  
879 *Acad Sci USA* **96**:3739–3744.
- 880 MacQuarrie CD, Mangione MC, Carroll R, James M, Gould KL, Sirotkin V. 2019. The *S. pombe* adaptor  
881 protein Bbc1 regulates localization of Wsp1 and Vrp1 during endocytic actin patch assembly. *J*  
882 *Cell Sci* **132**. doi:10.1242/jcs.233502
- 883 Marchand J-B, Kaiser DA, Pollard TD, Higgs HN. 2001. Interaction of WASP/Scar proteins with actin and  
884 vertebrate Arp2/3 complex. *Nature Cell Biology* **3**:76–82. doi:10.1038/35050590
- 885 Murphy DA, Courtneidge SA. 2011. The “ins” and “outs” of podosomes and invadopodia: characteristics,  
886 formation and function. *Nat Rev Mol Cell Biol* **12**:413–426. doi:10.1038/nrm3141

- 887 Padrick SB, Cheng H-C, Ismail AM, Panchal SC, Doolittle LK, Kim S, Skehan BM, Umetani J, Brautigam CA,  
888 Leong JM, Rosen MK. 2008. Hierarchical regulation of WASP/WAVE proteins. *Mol Cell* **32**:426–  
889 438. doi:10.1016/j.molcel.2008.10.012
- 890 Padrick SB, Doolittle LK, Brautigam CA, King DS, Rosen MK. 2011. Arp2/3 complex is bound and activated  
891 by two WASP proteins. *Proc Natl Acad Sci USA* **108**:E472–479. doi:10.1073/pnas.1100236108
- 892 Pollard TD. 1986. Rate constants for the reactions of ATP- and ADP-actin with the ends of actin  
893 filaments. *J Cell Biol* **103**:2747–2754.
- 894 Rodnick-Smith M, Luan Q, Liu S-L, Nolen BJ. 2016. Role and structural mechanism of WASP-triggered  
895 conformational changes in branched actin filament nucleation by Arp2/3 complex. *Proc Natl*  
896 *Acad Sci USA* **113**:E3834–3843. doi:10.1073/pnas.1517798113
- 897 Rohatgi R, Ma L, Miki H, Lopez M, Kirchhausen T, Takenawa T, Kirschner MW. 1999. The interaction  
898 between N-WASP and the Arp2/3 complex links Cdc42-dependent signals to actin assembly. *Cell*  
899 **97**:221–231.
- 900 Rotty JD, Wu C, Bear JE. 2013. New insights into the regulation and cellular functions of the ARP2/3  
901 complex. *Nat Rev Mol Cell Biol* **14**:7–12. doi:10.1038/nrm3492
- 902 Rouiller I, Xu X-P, Amann KJ, Egile C, Nickell S, Nicastro D, Li R, Pollard TD, Volkman N, Hanein D. 2008.  
903 The structural basis of actin filament branching by the Arp2/3 complex. *J Cell Biol* **180**:887–895.  
904 doi:10.1083/jcb.200709092
- 905 Sirotkin V, Beltzner CC, Marchand J-B, Pollard TD. 2005. Interactions of WASp, myosin-I, and verprolin  
906 with Arp2/3 complex during actin patch assembly in fission yeast. *The Journal of Cell Biology*  
907 **170**:637–648. doi:10.1083/jcb.200502053
- 908 Sirotkin V, Berro J, Macmillan K, Zhao L, Pollard TD. 2010. Quantitative Analysis of the Mechanism of  
909 Endocytic Actin Patch Assembly and Disassembly in Fission Yeast. *Mol Biol Cell* **21**:2894–2904.  
910 doi:10.1091/mbc.E10-02-0157
- 911 Smith BA, Daugherty-Clarke K, Goode BL, Gelles J. 2013a. Pathway of actin filament branch formation by  
912 Arp2/3 complex revealed by single-molecule imaging. *Proc Natl Acad Sci USA* **110**:1285–1290.  
913 doi:10.1073/pnas.1211164110
- 914 Smith BA, Padrick SB, Doolittle LK, Daugherty-Clarke K, Corrêa IR, Xu M-Q, Goode BL, Rosen MK, Gelles J.  
915 2013b. Three-color single molecule imaging shows WASP detachment from Arp2/3 complex  
916 triggers actin filament branch formation. *Elife* **2**:e01008. doi:10.7554/eLife.01008
- 917 Sun Y, Leong NT, Jiang T, Tangara A, Darzacq X, Drubin DG. 2017. Switch-like Arp2/3 activation upon  
918 WASP and WIP recruitment to an apparent threshold level by multivalent linker proteins in vivo.  
919 *Elife* **6**. doi:10.7554/eLife.29140
- 920 Sun Y, Schöneberg J, Chen X, Jiang T, Kaplan C, Xu K, Pollard TD, Drubin DG. 2019. Direct comparison of  
921 clathrin-mediated endocytosis in budding and fission yeast reveals conserved and evolvable  
922 features. *eLife* **8**:e50749. doi:10.7554/eLife.50749
- 923 Ti S-C, Jurgenson CT, Nolen BJ, Pollard TD. 2011. Structural and biochemical characterization of two  
924 binding sites for nucleation-promoting factor WASp-VCA on Arp2/3 complex. *Proc Natl Acad Sci*  
925 *USA* **108**:E463–471. doi:10.1073/pnas.1100125108
- 926 Wach A, Brachat A, Pöhlmann R, Philippsen P. 1994. New heterologous modules for classical or PCR-  
927 based gene disruptions in *Saccharomyces cerevisiae*. *Yeast* **10**:1793–1808.  
928 doi:10.1002/yea.320101310
- 929 Wagner AR, Luan Q, Liu S-L, Nolen BJ. 2013. WISH/DIP/SPIN90 proteins form a class of Arp2/3 complex  
930 activators that function without preformed actin filaments. *Curr Biol* **23**:1990–1998.  
931 doi:10.1016/j.cub.2013.08.029
- 932 Wu J-Q, Pollard TD. 2005. Counting cytokinesis proteins globally and locally in fission yeast. *Science*  
933 **310**:310–314. doi:10.1126/science.1113230

- 934 Yi K, Unruh JR, Deng M, Slaughter BD, Rubinstein B, Li R. 2011. Dynamic maintenance of asymmetric  
935 meiotic spindle position through Arp2/3-complex-driven cytoplasmic streaming in mouse  
936 oocytes. *Nat Cell Biol* **13**:1252–1258. doi:10.1038/ncb2320
- 937 Young ME, Cooper JA, Bridgman PC. 2004. Yeast actin patches are networks of branched actin filaments.  
938 *J Cell Biol* **166**:629–635. doi:10.1083/jcb.200404159
- 939 Zimmet A, Van Eeuwen T, Boczkowska M, Rebowski G, Murakami K, Dominguez R. 2020. Cryo-EM  
940 structure of NPF-bound human Arp2/3 complex and activation mechanism. *Sci Adv* **6**:eaaz7651.  
941 doi:10.1126/sciadv.aaz7651  
942  
943
